1 **Endogenous viral elements reveal associations between a non-retroviral RNA virus and**  
2 **symbiotic dinoflagellate genomes**  
3

4 Alex J. Veglia<sup>&1</sup>, Kalia S.I. Bistolas<sup>&2\*</sup>, Christian R. Voolstra<sup>3</sup>, Benjamin C. C. Hume<sup>3</sup>, Serge Planes<sup>4</sup>,  
5 Denis Allemand<sup>5</sup>, Emilie Boissin<sup>4</sup>, Patrick Wincker<sup>6</sup>, Julie Poulain<sup>6</sup>, Clémentine Moulin<sup>7</sup>, Guillaume  
6 Bourdin<sup>8</sup>, Guillaume Iwankow<sup>4</sup>, Sarah Romac<sup>9</sup>, Sylvain Agostini<sup>10</sup>, Bernard Banaigs<sup>4</sup>, Emmanuel Boss<sup>8</sup>,  
7 Chris Bowler<sup>11</sup>, Colomaban de Vargas<sup>9</sup>, Eric Douville<sup>12</sup>, Michel Flores<sup>13</sup>, Didier Forcioli<sup>14</sup>, Paola Furla<sup>14</sup>,  
8 Pierre Galand<sup>15</sup>, Eric Gilson<sup>14</sup>, Fabien Lombard<sup>16</sup>, Stéphane Pesant<sup>17</sup>, Stéphanie Reynaud<sup>18</sup>, Shinichi  
9 Sunagawa<sup>19</sup>, Olivier Thomas<sup>20</sup>, Romain Troublé<sup>7</sup>, Didier Zoccola<sup>18</sup>, Adrienne M.S. Correa<sup>1</sup>, and Rebecca  
10 L. Vega Thurber<sup>2</sup>

11  
12 <sup>1</sup> BioSciences Department, Rice University, Houston, TX, USA

13 <sup>2</sup> Microbiology Department, Oregon State University, Corvallis, OR, USA

14 <sup>3</sup> Department of Biology, University of Konstanz, Konstanz, Germany

15 <sup>4</sup> PSL Research University: EPHE-UPVD-CNRS, USR 3278 CRIOBE, Laboratoire d'Excellence  
16 CORAIL, Université de Perpignan, 52 Avenue Paul Alduy, 66860 Perpignan Cedex, France

17 <sup>5</sup> Centre Scientifique de Monaco, 8 Quai Antoine Ier, MC-98000, Principality of Monaco

18 <sup>6</sup> Génomique Métabolique, Genoscope, Institut François Jacob, CEA, CNRS, Univ Evry, Université Paris-  
19 Saclay, Evry, France

20 <sup>7</sup> Fondation Tara Océan, Base Tara, 8 rue de Prague, 75 012 Paris, France

21 <sup>8</sup> School of Marine Sciences, University of Maine, USA

22 <sup>9</sup> Sorbonne Université, CNRS, Station Biologique de Roscoff, AD2M, UMR 7144, ECOMAP, Roscoff,  
23 France

24 <sup>10</sup> Shimoda Marine Research Center, University of Tsukuba, 5-10-1, Shimoda, Shizuoka, Japan

25 <sup>11</sup> Institut de Biologie de l'Ecole Normale Supérieure (IBENS), Ecole normale supérieure, CNRS,  
26 INSERM, Université PSL, 75005 Paris, France

27 <sup>12</sup> Laboratoire des Sciences du Climat et de l'Environnement, LSCE/IPSL, CEA-CNRS-UVSQ,  
28 Université Paris-Saclay, F-91191 Gif-sur-Yvette, France

29 <sup>13</sup> Weizmann Institute of Science, Department of Earth and Planetary Sciences, 76100 Rehovot, Israel

30 <sup>14</sup> Université Côte d'Azur, CNRS, INSERM, IRCAN, Medical School, Nice, France and Department of  
31 Medical Genetics, CHU of Nice, France

32 <sup>15</sup> Sorbonne Université, CNRS, Laboratoire d'Ecogéochimie des Environnements Benthiques (LECOB),  
33 Observatoire Océanologique de Banyuls, 66650 Banyuls sur mer, France

34 <sup>16</sup> Sorbonne Université, Institut de la Mer de Villefranche sur mer, Laboratoire d'Océanographie de  
35 Villefranche, F-06230 Villefranche-sur-Mer, France

36 <sup>17</sup> European Molecular Biology Laboratory, European Bioinformatics Institute, Wellcome Genome  
37 Campus, Hinxton, Cambridge CB10 1SD, UK

38 <sup>18</sup> Centre Scientifique de Monaco, 8 Quai Antoine Ier, MC-98000, Principality of Monaco

39 <sup>19</sup> Department of Biology, Institute of Microbiology and Swiss Institute of Bioinformatics, Vladimir-  
40 Prelog-Weg 4, ETH Zürich, CH-8093 Zürich, Switzerland

41 <sup>20</sup> Marine Biodiscovery Laboratory, School of Chemistry and Ryan Institute, National University of  
42 Ireland, Galway, Ireland

43  
44 **\*Corresponding Author: Dr. Kalia Bistolas** [ksb97@cornell.edu](mailto:ksb97@cornell.edu), 415 Nash Hall, Oregon State  
45 University, Corvallis, OR 97331; orcid: 0000-0002-1664-5028

46 **Contributions & Authors contributed equally**

47  
48 **Running head:** Endogenization of a non-retroviral RNA virus in Symbiodiniaceae genomes  
49

50 **Keywords:** coral reef, endogenous viral element (EVE), genome, RNA virus, Symbiodiniaceae,  
51 symbiosis

52

### 53 **Abstract**

54 Endogenous viral elements (EVEs) offer insight into the evolutionary histories and hosts  
55 of contemporary viruses. This study leveraged DNA metagenomics and genomics to detect and  
56 infer the host of a non-retroviral dinoflagellate-infecting +ssRNA virus (dinoRNAV) common in  
57 coral reefs. As part of the Tara Pacific Expedition, this study surveyed 269 newly sequenced  
58 cnidarians and their resident symbiotic dinoflagellates (Symbiodiniaceae), associated  
59 metabarcodes, and publicly available metagenomes, revealing 178 dinoRNAV EVEs,  
60 predominantly among hydrocoral-dinoflagellate metagenomes. Putative associations between  
61 Symbiodiniaceae and dinoRNAV EVEs were corroborated by the characterization of  
62 dinoRNAV-like sequences in 17 of 18 scaffold-scale and one chromosome-scale dinoflagellate  
63 genome assembly, flanked by characteristically cellular sequences and in proximity to  
64 retroelements, suggesting potential mechanisms of integration. EVEs were not detected in  
65 dinoflagellate-free (aposymbiotic) cnidarian genome assemblies, including stony corals,  
66 hydrocorals, jellyfish, or seawater. The pervasive nature of dinoRNAV EVEs within  
67 dinoflagellate genomes (especially *Symbiodinium*), as well as their inconsistent within-genome  
68 distribution and fragmented nature, suggest ancestral or recurrent integration of this virus with  
69 variable conservation. Broadly, these findings illustrate how +ssRNA viruses may obscure their  
70 genomes as members of nested symbioses, with implications for host evolution, exaptation, and  
71 immunity in the context of reef health and disease.

72

73

### 74 **Introduction**

75 Endogenous viral elements, or “EVEs,” arise when whole or fragmented viral genomes  
76 are incorporated into host cell germlines. Once integrated, EVEs may propagate across  
77 successive host generations, potentially becoming fixed in a population through natural selection  
78 or drift (Johnson 2015, 2019). Therefore, the presence and content of EVEs can provide clues  
79 into the evolutionary relationships among host species and shed light on ancient and modern  
80 virus-host interactions (Johnson 2010). To date, most EVEs described in metazoan and plant  
81 genomes are retroviral, as this viral group must integrate their genome (as a provirus) into the  
82 genome of the host to replicate. Retroviruses thus possess and encode all of the molecular  
83 machinery (e.g. reverse transcriptases, integrases) required to integrate autonomously (Stoye  
84 2012). Remarkably, however, sequences from viruses that do not encode reverse transcriptases  
85 or exploit integration as a component of an obligate replication strategy – even viruses with no  
86 DNA stage – have also recently been detected as EVEs in diverse eukaryotic genomes (Gallot-  
87 Lavallée & Blanc 2017, Flynn and Moreau 2019, Horie et al. 2010, Katzourakis & Gifford 2010,  
88 Chiba et al. 2011, Chu et al. 2014, Kojima et al. 2021). These non-retroviral RNA EVEs have  
89 been reported in hosts ranging from unicellular algae to chiropteran (bat) genomes (Ballinger et  
90 al. 2012, Tromas et al. 2014, Palantini et al. 2017, Wang et al. 2014, Jebb et al. 2020,  
91 Moniruzzaman et al. 2020, Skirmuntt et al. 2020). Though the mechanisms behind non-retroviral  
92 integration continue to be explored, viral sequences may be introduced via nonhomologous  
93 recombination and repair, through interactions with host-provisioned integrases and reverse  
94 transcriptases supplied on mobile elements (e.g. retrotransposons), or by utilizing co-infecting  
95 viruses (Horie et al. 2010, Flynn & Moreau 2019).

96 Endogenization of any viral sequence (including non-retroviral EVEs) may have positive,  
97 neutral or negative effects on a host (Roossinck 2011, Harrison & Brockhurst 2017, Correa et al.  
98 2021). While many EVEs are functionally defective or deleterious and ultimately removed from  
99 a population via purifying selection, retained EVEs may remodel the genomic architecture of  
100 their hosts or introduce sources of genetic innovation later co-opted for host function (i.e.  
101 exaptation; Jern & Coffin 2008, Oliveira et al. 2008). Such ‘domesticated’ EVEs are utilized by  
102 hosts as regulatory elements, transcription factors, transposons, and templates for protein coding  
103 functions for purposes ranging from developmental pathways to brain function (Feschotte &  
104 Gilbert 2012, Frank & Feschotte 2017, Sofuku & Honda 2017, Takahashi et al. 2019). In  
105 particular, non-retroviral EVEs potentially serve as antiviral prototypes that help hosts combat  
106 infection by exogenous viruses currently circulating in the population (e.g. RNAi; Witfield et al.  
107 2017, Ter Horst 2019, Palantini et al. 2017, Suzuki et al. 2020). If expressed, EVEs may have a  
108 significant influence on the health, physiology and/or behavior of their hosts in natural and  
109 experimental systems (Parker & Brisson 2019, Suzuki et al. 2020, Wilson et al. 2001).

110 Investigating the distribution, sequence identity, and function of EVEs can yield insight  
111 into virus-host interactions across generations. EVEs catalogue a subset of the viruses that a host  
112 lineage has encountered and can link homologous extant viruses to contemporary hosts or known  
113 disease states (Holmes 2011, Suzuki et al. 2020). Because integrated elements may accrue  
114 mutations at a slower rate than exogenous viral genomes (Aiewsakun and Katzourakis, 2015,  
115 Flynn & Moreau 2019), EVEs can fill gaps in virus-host networks and act as synapomorphies,  
116 indicating the minimum time that a virus may have interacted with a host. As ‘genomic fossils’,  
117 EVEs have helped paleovirologists date the minimum origin of *Circoviridae*, *Hepadnaviridae*,  
118 *Bornaviridae*, *Orthornavirae*, *Lentiviridae*, and *Spumaviridae* infections within metazoans  
119 (Feschotte & Gilbert 2012, Johnson 2019). The evolutionary and ecological contexts that EVEs  
120 provide for exogenous viruses are particularly informative in understanding the interactions of  
121 viruses with multipartite or nested symbiotic systems (Patel et al. 2011, Katzourakis 2013,  
122 Aiewsakun & Katzourakis, 2015).

123 Coral holobionts – the cnidarian animal and its resident microbial assemblage, including  
124 dinoflagellates in the family Symbiodiniaceae, bacteria, archaea, fungi, and viruses – are an  
125 ecologically and economically valuable, multipartite non-model system (Knowlton & Rohwer,  
126 2003, Matthews et al. 2020). Symbiodiniaceae are key obligate nutritional symbionts of corals  
127 and support their hosts in the construction of reef frameworks (LaJeunesse et al. 2018).  
128 However, environmental stress can break down coral-Symbiodiniaceae partnerships, resulting in  
129 bleaching – the mass loss of Symbiodiniaceae cells (Glynn 1996). Some bleaching signs (paling  
130 of a coral colony) are hypothesized to also result from viral lysis of Symbiodiniaceae (van Oppen  
131 et al. 2009, Correa et al. 2016, Vega Thurber et al. 2017, Messyasz et al. 2020, Correa et al.  
132 2021, Grupstra et al. 2022), but direct evidence supporting this hypothesis remains limited.  
133 Overall, the role of viruses in coral colony health and disease requires further examination.

134 Non-retroviral +ssRNA dinoRNAV sequences were first reported in stony corals based  
135 on five metatranscriptomic sequences and corroborated by Symbiodiniaceae EST libraries  
136 (Correa et al. 2013). Subsequent studies indicated that similar +ssRNA viruses are commonly  
137 detected in coral RNA viromes and metatranscriptomes, as well as via targeted amplicon assays  
138 (Weynberg et al. 2014, Levin et al. 2017, Montalvo-Proano et al. 2017, Grupstra et al. 2022).  
139 These viruses exhibit synteny and significant homology to *Heterocapsa circularisquama* RNA  
140 virus (HcRNAV; Levin et al. 2017), the sole recognized representative of the genus  
141 *Dinornavirus* and a known pathogen of free-living dinoflagellates (Nagasaki et al. 2005). Both

142 HcRNAV and dinoRNAV sequences detected in coral holobiont tissues contain two ORFs – a  
143 Major Capsid Protein (*MCP*) and RNA dependent RNA polymerase (*RdRp*). Furthermore,  
144 icosahedral virus-like particle (VLP) arrays resembling HcRNAV (but with 40% smaller  
145 individual particle diameters) have been imaged in the Symbiodiniaceae-dense coral  
146 gastrodermis tissue and in Symbiodiniaceae themselves (Lawrence et al. 2014). Levin et al.  
147 (2017) assembled the 5.2kb genome of a putative dinoRNAV from a poly(A)-selected  
148 metatranscriptome generated from cultured *Symbiodinium*. The assembly contained a 5'  
149 dinoflagellate spliced leader (“dinoSL”; Zhang et al. 2013) — a component of >95% of  
150 Symbiodiniaceae mRNAs, speculated to illustrate molecular mimicry — and exhibited >1000-  
151 fold higher expression in a thermosensitive *Cladocopium C1* population relative to a  
152 thermotolerant population of this Symbiodiniaceae strain at ambient temperatures (27°C, Levin  
153 et al. 2017, LaJeunesse et al. 2018). Together, the findings from these studies suggest that  
154 Symbiodiniaceae are target hosts of reef-associated dinoRNAVs.

155 This study (1) systematically searched for putative endogenized dinoRNAVs in  
156 metagenomes from *in situ* (symbiotic) coral colonies and seawater, as well as in available  
157 genomes of Symbiodiniaceae and aposymbiotic (symbiont-free) cnidarians, (2) investigated the  
158 evolutionary relationship of putative dinoRNAV EVEs to exogenous reef-associated dinoRNAV  
159 sequences, and (3) made preliminary inferences regarding the distribution and possible function  
160 of these dinoRNAV EVEs based on their detection, prevalence, and genomic context.

161

## 162 **Methods**

163

### 164 *Identification and computational validation of dinoRNAV EVEs leveraging meta'omics*

165 The Tara Pacific Expedition (2016-2018) sampled coral reefs to investigate reef health  
166 and ecology using multiple methods, including amplicon sequencing and metagenomics (Planes  
167 et al. 2019). In this study, we explored metagenomes generated from hydrocorals (n=60  
168 *Millepora*), stony corals (n=108 *Porites*, n=101 *Pocillopora*) sampled from 11 islands across the  
169 South Pacific Ocean during the Tara Pacific Expedition for dinoRNAV EVEs (Figure 1,  
170 Supplementary Table 1A, 1B; Pesant et al. 2020). Amplicon libraries of the dinoflagellate  
171 Internal Transcribed Spacer 2 (ITS2) gene fragment were sequenced in tandem with the  
172 metagenomes, to characterize the dominant Symbiodiniaceae harbored by hydrozoan and stony  
173 coral colonies (Hume et al. 2020).

174 To confirm that these dinoRNAV EVE sequences were affiliated with coral holobionts  
175 and reduce the possibility that they are technical artifacts, publicly available metagenome  
176 libraries were analyzed. These additional libraries included 120 assembled pelagic water samples  
177 presumed to include pelagic dinoflagellate sequences from the Tara Oceans dataset (2009-2013;  
178 Pesant et al. 2015) and 30 MiSeq metagenomes from unfractionated samples of the stony coral  
179 genus *Acropora*, which were processed and sequenced via a different pipeline (Supplemental  
180 Table 1B, Supplemental Figure 1). Publicly accessible transcriptomes from *Symbiodinium*  
181 *microadriaticum* (Supplemental Table 1B) were also queried to determine if dinoRNAV-like  
182 sequences were present in poly(A)-selected dinoflagellate transcriptomes and resembled EVEs in  
183 terms of proximal gene composition and presence of a characteristic pre-mRNA spliced leader  
184 (SL) sequence (as in Levin et al, 2017). Details regarding the collection of samples, generation of  
185 metagenomes and associated Symbiodiniaceae amplicon libraries, and associated bioinformatic  
186 analyses are provided in Supplementary Figure 1).



187 Metagenomic and transcriptomic scaffolds were annotated against a curated database of  
188 dinoRNAV-like sequences (Supplemental Table 2) via BLASTx (Altschul et al. 1990,  
189 Supplementary Figure 1). Alignments to the custom database with a bit score <50 and percent  
190 shared amino acid identity <30% were excluded from further analysis. A length penalty was not  
191 imposed during this step due to the limited length of assembled scaffolds (average  
192 N50=3341±127 nt across all queried libraries). Open reading frames (ORFs) from selected  
193 scaffolds were called via Prodigal (v.2.6.3; Hyatt et al. 2010) and annotated against the NCBI-nr  
194 database (DIAMOND v.2.0.6; Buchfink et al. 2015) to confirm homology to dinoRNAVs and  
195 identify adjacent dinoflagellate sequences. In the absence of complete ORFs (potentially due to  
196 the limited size of scaffolds, partial integrations, etc.), homology was confirmed through  
197 comparison of the initial alignments to the curated database and 300nt of upstream/downstream  
198 flanking sequences (bedtools v.2.30.0; Quinlan et al, 2010) against the NCBI-nr database. Non-  
199 normalized quality-controlled reads were mapped via bbmap (v.38.84; Bushnell et al. 2017), and  
200 putative EVEs were assessed for uniform read coverage across scaffolds, reducing the likelihood  
201 of chimeric assembly. RNA secondary structure was predicted via mfold (v.3.5; Zuker et al  
202 2003).

203

#### 204 *dinoRNAV EVEs in dinoflagellate and aposymbiotic cnidarian genomes*

205 Publicly available dinoflagellate and aposymbiotic (dinoflagellate-free) cnidarian genome  
206 assemblies were queried to resolve the putative host(s) of dinoRNAVs, to assess homology  
207 among detected dinoRNAVs within coral holobionts, and to compare genes proximal to  
208 dinoRNAV EVEs in different host species/strains. A chromosome-scale dinoflagellate genome  
209 assembly generated from a *Symbiodinium microadriaticum* culture (Accession: GSE152150,  
210 Nand et al. 2021), and scaffold-scale genome assemblies were examined for dinoRNAV EVEs  
211 (Supplemental Table 1B). Scaffold-scale genome assemblies were from the closely related  
212 families Symbiodiniaceae and Suessiaceae, and included representatives from the genera  
213 *Symbiodinium* (n=9), *Breviolum* (n=1), *Cladocopium* (n=3), *Durusdinium* (n=1), *Fugacium*  
214 (n=2), and *Polarella* (n=2), as well as 25 aposymbiotic cnidarian genome assemblies, including  
215 the stony coral genera *Acropora* (n=13), *Astreopora* (n=1), *Galaxea* (n=1), *Montastraea* (n=1),  
216 *Montipora* (n=3), *Orbicella* (n=1), *Pocillopora* (n=2), *Porites* (n=1), and *Stylophora* (n=1), and  
217 the jellyfish *Clytia* (n=1; Figure 2, Supplemental Table 1B). Genome completeness and quality  
218 were assessed via BUSCO (v3; Simão et al. 2015) with the Eukaryota dataset and QUAST  
219 (v5.0.2; Gurevich et al. 2013), respectively. Scaffolds/chromosomes containing putative  
220 dinoRNAV EVEs were identified by aligning sequences to the protein version of the Reference  
221 Viral DataBase (RVDB v.19; Bigot et al. 2019) using DIAMOND BLASTx (v0.9.30; Buchfink  
222 et al. 2015). The same exclusion criteria were maintained for alignments of metagenomic  
223 scaffolds, also omitting alignments <100 amino acids. Regions of dinoflagellate genomes  
224 exhibiting similarity to the *MCP* or *RdRp* of reef-associated dinoRNAV reference genomes  
225 (Levin et al. 2017) or other closely related +ssRNA viruses (Supplemental Table 2) were  
226 extracted and re-aligned to the NCBI-nr database to further confirm viral homology. Putative  
227 whole dinoRNAV-like genomes within scaffolds were identified based on the presence of *MCP*  
228 and *RdRp*-like sequences on the same scaffold no further than 1.5 Kbp apart (Table 1;  
229 Supplemental Figure 2). IRESPred (Kolekar et al., 2016) was utilized to identify internal  
230 ribosomal entry sites (IRES) on putative dinoRNAV EVE with whole sequence integrations.

231 ORFs were predicted and annotated from dinoRNAV EVE-containing scaffolds and all  
232 dinoflagellate chromosomes using Prodigal (Hyatt et al. 2010) and MAKER2 annotation pipeline

233 (Holt and Yandell 2011) with the AUGUSTUS gene prediction software (Stanke et al. 2006).  
234 Translated ORFs were then aligned to a hybrid database containing the UniProt/Swiss-Prot  
235 database and protein version of RVDB (v.19; DIAMOND-BLASTp). ORFs on putative  
236 dinoRNAV EVE-containing scaffolds and chromosomes were further annotated using  
237 InterProScan (v5.48-83.0, Pfam, PANTHER) to identify sequences proximal to putative  
238 dinoRNAV integrations.

239

#### 240 *Phylogenetic analysis of dinoRNAV EVEs*

241 Amino acid-based phylogenetic trees were generated with dinoRNAV EVE ORFs (*MCP*  
242 and *RdRp*) from scaffold-scale genomic assemblies, metagenomes, transcriptomes, and  
243 sequences from exogenous and closely related +ssRNA reference viruses (Supplemental Table  
244 1A,B, Supplementary Table 2). Sequences were aligned using the best fit algorithm determined  
245 by MAFFT (v7.464; Katoh and Standley 2013) and reviewed and trimmed manually in MEGA  
246 (v7; Kumar et al. 2016). Maximum-likelihood trees were generated with IQTREE2 (Minh et al.  
247 2020) using the model determined by ModelFinder (Kaylaanamoorthy et al. 2017) and 50,000  
248 parametric bootstraps (Hoang et al. 2018) with nearest neighbor interchange optimization.

249

## 250 **Results and Discussion**

251

### 252 *Evidence of Endogenized dinoRNAVs in Coral Holobiont Metagenomes*

253 Putative dinoRNAV EVEs were detected in metagenomes generated from 42 cnidarian  
254 holobionts out of 269 sampled across the South Pacific Ocean. The majority of endogenized  
255 dinoRNAVs were identified in hydrocoral metagenomes (*Millepora* spp.) which predominantly  
256 harbored *Symbiodinium* dinoflagellates (n=105; 70.5%), but EVE-like sequences were also  
257 observed in scleractinian coral metagenomes (*Pocillopora* spp.) which predominantly harbored  
258 *Cladocopium* and *Durusdinium* dinoflagellates (n=15; 29.5%; Figure 1B,C). No dinoRNAV-like  
259 sequences were detected among *Porites* spp. metagenomes (Figure 1, Figure 2). Hydrocoral  
260 metagenomes were sequenced at equivalent depths as scleractinian corals and had comparable  
261 levels of annotation (Supplementary Table 3); thus, higher dinoRNAV EVE prevalence in  
262 hydrocoral libraries was likely not a result of methodological bias. Of the 11 evaluated South  
263 Pacific islands, dinoRNAV EVEs were identified in samples from eight (Guam, Gambier,  
264 Moorea, Cook, Niue, Malpelo, Coïba, and Las Perlas), spanning 18 unique sites (Figure 1C).  
265 There was a distinct longitudinal trend among *Pocillopora* spp. metagenomes; putative  
266 dinoRNAV EVEs were only identified in this coral genus on the Central American coast  
267 (CAMR, Coastal Pacific Longhurst Province).

268 Importantly, endogenized dinoRNAV open reading frames (ORFs) appeared to be  
269 immediately adjacent to ORFs identified as dinoflagellate (typically Symbiodiniaceae) genes—  
270 they were not proximal to coral genes or those of other cellular organisms abundant in these  
271 metagenomes (Supplementary Table 4). We examined the Symbiodiniaceae ITS2 profiles (Hume  
272 et al. 2020) associated with each metagenome and found that putative dinoRNAV EVEs were  
273 primarily associated with *Symbiodinium*, *Cladocopium*, and *Durusdinium*, which exhibited  
274 variation on both host and regional scales (Figure 1D). DinoRNAV EVEs were more common  
275 in *Symbiodinium*-dominated cnidarians ( $F_{2,1044}=25.8$ ,  $p<0.0001$ , nested ANOVA; Supplemental  
276 Figure 3) relative to cnidarians hosting other Symbiodiniaceae genera, regardless of host. This  
277 suggested that dinoRNAV integration may be particularly recurrent or conserved within the  
278 genus *Symbiodinium* (Figure 1).

279 To determine if these putative viral integrations were specific to cnidarian holobiont  
280 metagenomes and ensure that they were not artifacts of shared sample processing and sequencing  
281 procedures of the Tara Pacific pipeline, we also analyzed seawater metagenomes and publicly  
282 available metagenomes from the stony coral-dinoflagellate holobiont, *Acropora* spp.  
283 (Supplemental Table 1B). Examination of 120 Tara Oceans pelagic seawater metagenomes  
284 (Pesant et al. 2015) yielded no sequences sharing homology to dinoRNAVs. The concentration  
285 of Symbiodiniaceae cells within cnidarian tissues is significantly higher than that of the  
286 surrounding seawater (Littman et al. 2008, Schuefen et al. 2017, Fujise et al. 2021, Grupstra et  
287 al. 2021). Thus, lack of detection of dinoRNAV-like sequences from seawater metagenomes is  
288 likely due to reduced genomic signal of Symbiodiniaceae in the water column. Analysis of the 30  
289 non-Tara *Acropora* holobiont metagenomes identified 29 more putative dinoRNAV EVEs  
290 (Figure 2). These dinoRNAV EVEs were again neighboring dinoflagellate ORFs. While the  
291 Caribbean *Acropora* metagenomes analyzed contained too few reads to resolve the dominant  
292 Symbiodiniaceae present, earlier studies of the same coral colonies identified *Symbiodinium* spp.  
293 as the primary symbiont present (Muller et al. 2018).

294 The identification of endogenized dinoRNAV-like sequences in cnidarian holobiont  
295 metagenomes, combined with the proximity of dinoRNAV-like ORFs to dinoflagellate-like  
296 sequences across metagenomes harboring diverse dinoflagellate consortia, collectively indicate  
297 that dinoRNAV EVEs are widespread among Symbiodiniaceae genera (Figure 2 cyan dots).

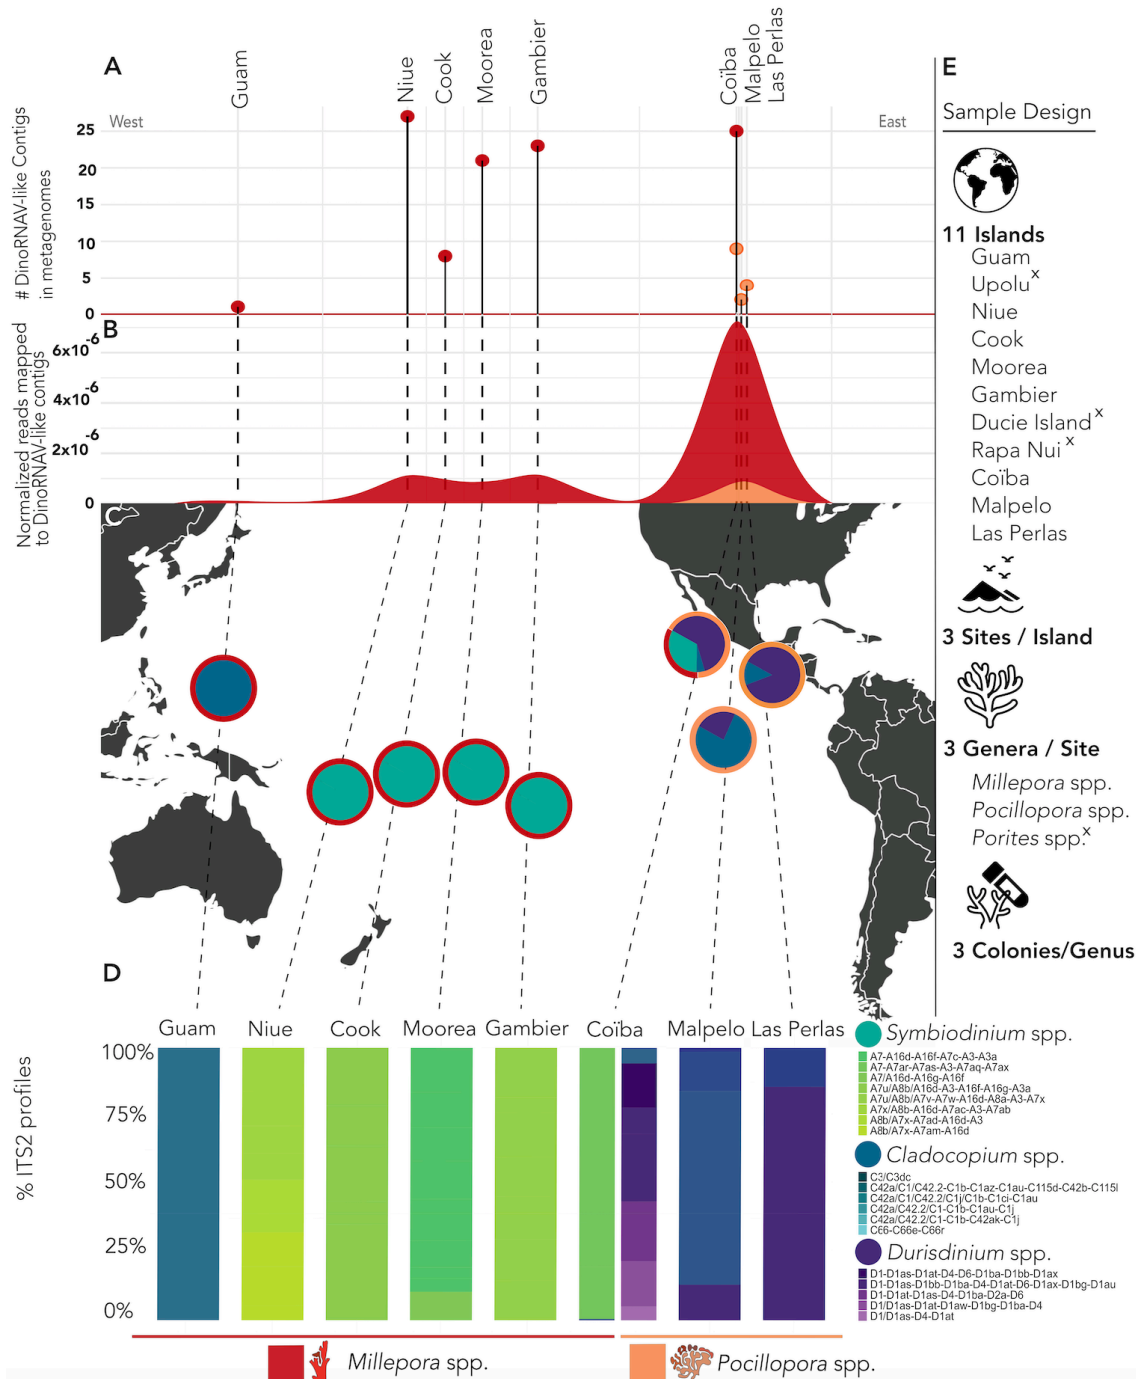

298  
299 **Figure 1.** Islands and species (cnidarian and dinoflagellate) correlating with dinorNAV EVE-like sequence  
300 detection among Tara Pacific metagenomes. (A) Count of scaffolds with putative endogenized dinorNAV-like  
301 sequences among Tara Pacific metagenomes, grouped by island and spaced longitudinally by location sampled. (B)  
302 Reads mapped to dinorNAV-like scaffolds within individual Tara Pacific metagenomic libraries, normalized by  
303 quality-controlled reads. (C) Sampling sites of Tara Pacific metagenomes explored for endogenized dinorNAV-like  
304 sequences in this study. Internal circles indicate dominant Symbiodiniaceae genera based on ITS2 type profiles,  
305 outer ring denotes coral host(s) sampled at each island. (D) Symbiodiniaceae ITS2 type profile metabarcoding as  
306 delineated via Symportal (Hume et al, 2019) within island and host. (E) Sample design of Tara Pacific libraries  
307 queried for dinorNAV EVEs. [x] indicates islands or species where no dinorNAV-like sequences were detected.  
308 [this image is a low resolution placeholder]



309

310 *Endogenized DinoRNAs Detected in Symbiodiniaceae Genomes*

311 To further test the hypothesis that dinoRNAs on reefs infect dinoflagellate symbionts  
 312 and not cnidarians, we examined 18 scaffold-scale genome assemblies representing the  
 313 dinoflagellate families Symbiodiniaceae and Suessiaceae as well as 25 cnidarian genomes  
 314 spanning 10 genera (Supplemental Table 1B; Figure 2; Table 1). Alignments revealed no  
 315 evidence of endogenized dinoRNAs in any of the 151,782 aposymbiotic (dinoflagellate-free)  
 316 cnidarian scaffolds. In contrast, the same approach uncovered 351 (of 593,433) dinoflagellate  
 317 scaffolds with evidence of endogenized dinoRNAs (Figure 2; Table 1). The identified 351  
 318 dinoRNA EVE-containing scaffolds were observed across 17 of the 18 dinoflagellate genome  
 319 assemblies (Table 1). DinoRNA EVEs were also observed in two assemblies from the free-  
 320 living dinoflagellate genus, *Polarella* (family Suessiaceae), which is closely related to the family  
 321 Symbiodiniaceae, and served as an outgroup in this study (Janoušková et al. 2017; Stephens et  
 322 al. 2020). Interestingly, assemblies belonging to *Symbiodinium*, the most ancestral  
 323 Symbiodiniaceae genus (LaJeunesse et al. 2018), contained a higher number of scaffolds with  
 324 putative dinoRNA EVEs ( $\bar{x}$ =28.11, stdev=10.7) relative to assemblies of other  
 325 Symbiodiniaceae genera ( $\bar{x}$ =8.71, stdev=11; Figure 2 cyan dots; Table 1). This result may clarify  
 326 why observations of dinoRNA-like ORFs were more common in metagenomes dominated by  
 327 *Symbiodinium* (Figure 1D). The dinoflagellate genome assembly with no detected dinoRNA  
 328 EVEs belonged to a relatively incomplete assembly of *Cladocopium* C15, which had the second  
 329 lowest N50 and lowest BUSCO completeness score of all genomes examined (completeness  
 330 11.6%, relative to the average 24.54%; Table 1, Supplementary Table 5). The lower  
 331 coverage/completeness of the *Cladocopium* C15 assembly indicates a reduced window into this  
 332 genome. It is therefore possible that when a more complete assembly is generated, dinoRNA  
 333 EVE-like sequences will be detectable from this dinoflagellate. However, a linear model  
 334 suggested that there was no relationship between dinoRNA EVE detection and assembly  
 335 statistics (i.e. number of scaffolds, N50, completeness). Furthermore, since we were unable to  
 336 detect dinoRNA EVEs in *Porites* metagenomes – a coral species primarily harboring  
 337 *Cladocopium* C15 symbionts – we hypothesize that dinoRNA endogenization is less common  
 338 in this lineage of Symbiodiniaceae.

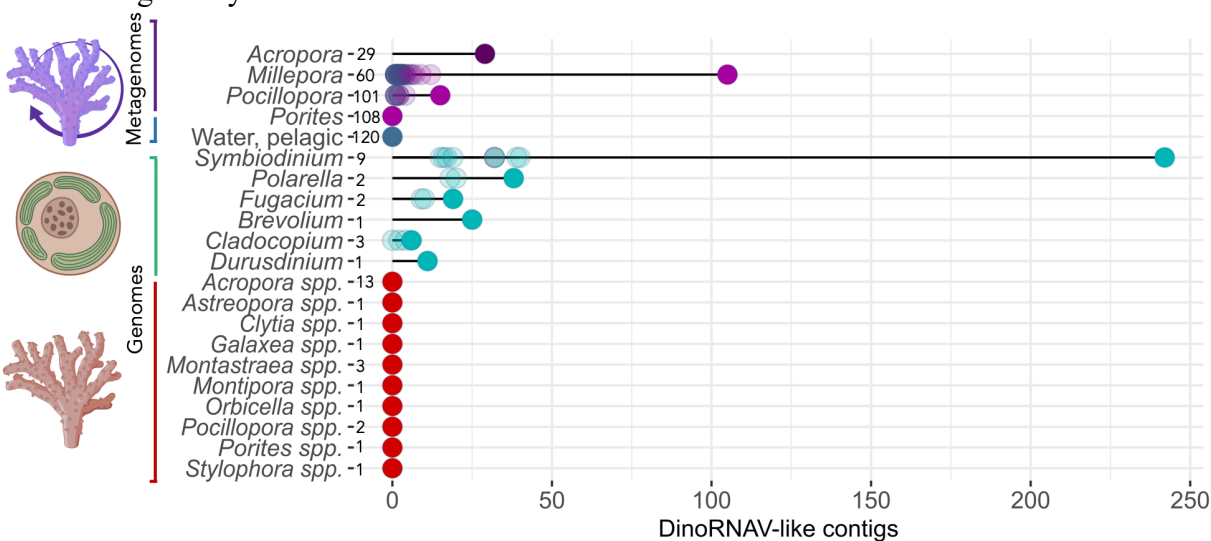

339

340

341 **Figure 2.** Total quantity of putative endogenized dinoRNAV EVEs identified, broadly organized by sample source  
 342 (metagenome or genome), and number of libraries or assemblies queried (numbers follow a dash to the right of  
 343 source name). Opaque circles denote the sum total of dinoRNAV EVE-like sequences identified from each source,  
 344 while transparent circles denote independent counts per library queried.

|                                                              | Dinoflagellate Species (strain)                        | Total # Scaffolds          | Host                                      | Location     | BUSCO score | dinoRNAV EVE ORFs on scaffolds |     |      |
|--------------------------------------------------------------|--------------------------------------------------------|----------------------------|-------------------------------------------|--------------|-------------|--------------------------------|-----|------|
|                                                              |                                                        |                            |                                           |              |             | RdRp                           | MCP | Both |
| Symbiodiniaceae                                              | <i>Symbiodinium linucheae</i> (CCMP2456) [1]           | 37,772                     | <i>Plexaura homamalla</i>                 | Bermuda      | 21.8%       | 39                             | 0   | 1    |
|                                                              | <i>Symbiodinium microadriaticum</i> (04-503SCI.03) [1] | 57,558                     | <i>Orbicella faveolata</i>                | Florida, USA | 41.6%       | 30                             | 1   | 3    |
|                                                              | <i>Symbiodinium microadriaticum</i> (CassKB8) [1]      | 67,937                     | <i>Cassiopea sp.</i>                      | Hawaii, USA  | 73.3%       | 29                             | 1   | 3    |
|                                                              | <i>Symbiodinium microadriticum</i> (CCMP2467) [2,3]    | 9,688                      | <i>Stylophora pistillata</i>              | Red Sea      | 15.6%       | 29                             | 1   | 3    |
|                                                              | <i>Symbiodinium natans</i> (CCMP2548) [1]**            | 2,855                      | N/A (Isolated from seawater)              | Hawaii, USA  | 15.5%       | 14                             | 1   | 3    |
|                                                              | <i>Symbiodinium necroappetens</i> (CCMP2469) [1]*      | 104,583                    | <i>Condylactis gigantea</i>               | Jamaica      | 22.8%       | 37                             | 4   | 2    |
|                                                              | <i>Symbiodinium pilosum</i> (CCMP2461) [1]**           | 48,302                     | <i>Zoanthus sociatus</i>                  | Jamaica      | 19.8%       | 15                             | 0   | 0    |
|                                                              | <i>Symbiodinium tridacnidorum</i> (CCMP2592) [1]       | 6,245                      | <i>Heliofungia actiniformis</i>           | Australia    | 21.1%       | 17                             | 1   | 0    |
|                                                              | <i>Symbiodinium tridacnidorum</i> (sh18 A3 Y106) [4]   | 16,176                     | <i>Tridacna crocea</i>                    | Japan        | 19.8%       | 20                             | 1   | 0    |
|                                                              | <i>Brevolium minutum</i> (Mf1.05b) [5]                 | 21,899                     | <i>Orbicella faveolata</i>                | Florida, USA | 14.2%       | 21                             | 3   | 1    |
|                                                              | <i>Cladocopium</i> C15 [6]                             | 34,589                     | <i>Porites lutea</i>                      | Australia    | 11.6%       | 0                              | 0   | 0    |
|                                                              | <i>Cladocopium goreau</i> [7]                          | 41,289                     | <i>Acropora tenuis</i>                    | Australia    | 27.7%       | 4                              | 0   | 0    |
|                                                              | <i>Cladocopium sp</i> C92 (Y103) [4]                   | 6,686                      | <i>Fragum sp.</i>                         | Japan        | 19.5%       | 2                              | 0   | 0    |
|                                                              | <i>Durusdinium trenchii</i> [9]                        | 19,593                     | <i>Favia speciosa</i>                     | Japan        | 28.7%       | 10                             | 1   | 0    |
|                                                              | <i>Fugacium kawagutti</i> (CS156 CCMP2468) [7]         | 16,959                     | <i>Montipora verrucosa</i>                | Hawaii, USA  | 8.3%        | 8                              | 1   | 0    |
| <i>Fugacium kawagutti</i> (CCMP2468) [9]                     | 30,040                                                 | <i>Montipora verrucosa</i> | Hawaii, USA                               | 17.9%        | 9           | 1                              | 0   |      |
| <b>n=314 scaffolds with DinoRNAV EVE-like sequences</b>      |                                                        |                            |                                           |              |             |                                |     |      |
| Suessiaceae                                                  | <i>Polarella glacialis</i> (CCMP1383) [10] **          | 33,494                     | N/A (Free-living, isolated from seawater) | Antarctica   | 20.8%       | 20                             | 0   | 0    |
|                                                              | <i>Polarella glacialis</i> (CCMP2088) [10] **          | 37,768                     | N/A (Free-living, isolated from seawater) | Arctic       | 21.8%       | 18                             | 0   | 0    |
| <b>n=38 total scaffolds with DinoRNAV EVE-like sequences</b> |                                                        |                            |                                           |              |             |                                |     |      |

345 **Table 1.** DinoRNAV EVE-like detections from representative Symbiodiniaceae and Suessiaceae dinoflagellate  
346 scaffold-level genome assemblies, as well as the host species and location of isolation for each dinoflagellate.  
347 Assembly coverage and completeness are measured via BUSCO score (% completeness, or %C; Simão et al, 2015).  
348 \* Indicates species with documented opportunistic life history; \*\* Indicates species with documented free-living life  
349 history per principal species description. Total counts of dinoflagellate scaffolds in genomes queried with individual  
350 endogenized dinoRNAV ORFs (*RdRp*, *MCP*) or both ORFs nearby one another are provided. *RdRp* = RNA-  
351 dependent RNA polymerase; *MCP* = major capsid protein. [1] Gonzalez-Pech et al. 2021, [2] Aranda et al. 2016, [3]  
352 Gonzalez-Pech et al. 2019, [4] Shoguchi et al. 2018, [5] Shoguchi et al. 2013, [6] Robbins et al. 2019, [7] Liu et al.  
353 2018, [8] Shoguchi et al. 2020, [9] Lin et al 2015, [10] Stephens et al. 2020. Further genome citations (including  
354 accession numbers) and BUSCO completion metrics can be found in Supplementary Table 5.

355

### 356 *Incomplete ORFs and Possible Duplications Indicate Endogenization of DinoRNAVs*

357 The repeated observation of putative dinoRNAV EVEs in dinoflagellate scaffolds and  
358 contigs from metagenomes and genomes suggests these sequences are either (1) conserved  
359 sequence artifacts of Symbiodiniaceae-dinoRNAV interactions, and/or (2) evidence of highly  
360 prevalent dinoflagellate viruses, commonly integrated and propagated via their single-celled  
361 hosts. If the observed dinoRNAV-like sequences represent active infections capable of  
362 generating virions during egress, we would, at minimum, expect essential ORFs associated with  
363 replication (RNA-dependent RNA polymerase, *RdRp*) and virion structure (Major Capsid  
364 Protein, *MCP*) to be endogenized on the same scaffold. We would additionally expect to observe  
365 overall conservation of ORF length/composition (with a lack of internal stop codons or  
366 significant deletions) when aligning the dinoRNAV-like sequences detected here with known  
367 exogenous dinoRNAV sequences.

368 However, both DIAMOND and gene prediction analyses generally depicted dinoRNAV-  
369 like ORFs in isolation on separate scaffolds. While 28 *MCP* and 73 *RdRp* dinoRNAV ORFs  
370 were annotated, both ORFs were present on a Symbiodiniaceae scaffold – potentially  
371 representing whole dinoRNAV genome integrations – in only 14 instances. Thirteen of these 14  
372 were from *Symbiodinium* genomes, whereas one scaffold was from *Breviolum minutum*, a  
373 member of the second most ancestral dinoflagellate genus (Table 1; LaJeunesse et al. 2018). To  
374 assess the conservation of putative dinoRNAV EVE sequence length/composition, we aligned  
375 the genomic and single ORF EVEs to reference exogenous dinoRNAV sequences. The reference  
376 genome for reef-associated dinoRNAVs is ~5 Kbp long and contains a 1,071 bp noncoding  
377 region between ORFs, with a 124-nucleotide internal ribosomal binding site (Levin et al. 2017).  
378 In this study, for 13 of the scaffolds in which dinoRNAV ORFs were detected, the putative  
379 noncoding region between the *MCP* and *RdRp* EVEs ranged from ~200-800 bp (except for a  
380 scaffold belonging to *S. linucheae* CCMP2456, which contained a ~79 kbp noncoding region,  
381 and was excluded in further alignments). No internal ribosomal binding sites were detected  
382 within the putative dinoRNAV EVEs identified in dinoflagellate genomes. A nucleotide-based  
383 alignment to Levin et al.'s (2017) reference dinoRNAV genome indicated that the putative  
384 dinoRNAV EVEs presented here contained substantial insertions and/or deletions (Supplemental  
385 Figure 2). Translated exogenous dinoRNAV *MCP* ORFs are reported to be ~358 aa in length  
386 (Levin et al. 2017; Figure 3 top sequences), but dinoRNAV-like *MCP* sequences recovered in  
387 this study ranged from 116-605aa in length. Furthermore, comparisons of these endogenous  
388 *MCPs* to exogenous reference sequences revealed internal stop codons and overall low similarity  
389 (Figure 3), instead sharing high conservation in structural amino acid motifs. Amino acid-based  
390 alignment of endogenous dinoRNAV *MCPs* to metatranscriptome- and amplicon-generated  
391 exogenous reference sequences (Levin et al. 2017, Montalvo-Proañó et al. 2017) revealed that

392 indels and regions of low similarity were observed between three conserved regions across both  
393 endogenous and exogenous MCP sequences (red boxes in Figure 3).

394 Interestingly, multiple whole dinoRNAV integrations were sometimes observed in a  
395 single dinoflagellate genome. For example, genome assemblies of four different *S.*  
396 *microadriaticum* strains contained two or three whole dinoRNAV EVEs each (Table 1; Figure  
397 3).

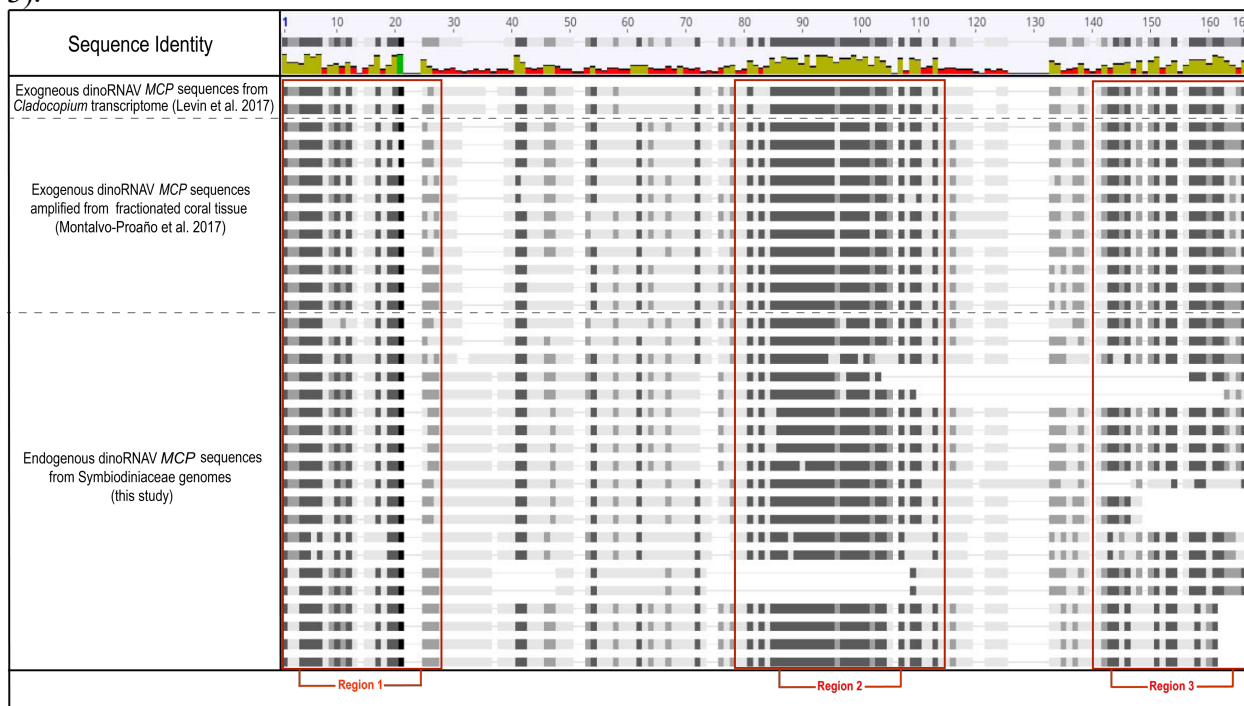

398  
399 **Figure 3.** Amino acid alignment including major capsid protein (MCP) reference sequences from exogenous  
400 dinoRNAV-like +ssRNA viruses, as well as putatively endogenous dinoRNAV MCP sequences. Exogenous  
401 reference sequences include: 1. Symbiodiniaceae +ssRNA virus MCP ORFs recovered from a *Cladocopium* sp.  
402 transcriptome (Levin et al, 2017), and 2. dinoRNAV MCP amplicons from fractionated coral tissue (Montalvo-  
403 Proañó et al. 2017). Conserved regions observed in exogenous and putatively endogenous sequences are labeled as  
404 Regions 1-3.

405  
406 Pairwise alignments measuring shared nucleotide identity of whole dinoRNAV EVEs across  
407 Symbiodiniaceae scaffolds revealed that the *S. microadriaticum* genomes and the *S.*  
408 *necroappetens* genome share two whole genome dinoRNAV EVEs (provisionally dinoRNAV-A  
409 and dinoRNAV-B; Supplemental Figure 2; Clustal-Omega; Sievers et al. 2011). *S.*  
410 *microadriaticum* dinoRNAV-B was identical in all strains and shared 97% identity with the *S.*  
411 *necroappetens* dinoRNAV-B, yet proximal genes varied (Supplemental Table 6). The  
412 inconsistent composition and fragmented nature of both the genomic and single ORF dinoRNAV  
413 EVEs reported here supports the hypothesis that these sequences are not capable of generating  
414 replicative virions and are best interpreted as multiple integrations of dinoRNAVs into a host  
415 genome.

#### 417 *A Potential Mechanism for dinoRNAV Endogenization: Host-Provisioned Retroelements*

418 To assess if general genomic “neighborhoods” are conserved across dinoRNAV  
419 integrations (e.g. site location and synteny) and to better understand the genes proximal to EVEs  
420 on Symbiodiniaceae genomes, a chromosome-scale *Symbiodinium microadriaticum* genome



421 assembly was evaluated (Figure 4). The highest quality dinoflagellate genome assembly  
422 currently available revealed dinoRNAV-like ORFs on 18 of 94 chromosomes, with at least one  
423 *RdRp* on each, and some with multiple (two with  $n=2$  *RdRps*, three with  $n=3$  *RdRps*). On three of  
424 the chromosomes (# 30, 35, and 74), there were predicted ORFs annotated as dinoRNAV *MCPs*  
425 in close proximity to a *RdRp* ORF (separated by noncoding regions 319-656nt), indicative of a  
426 potential full-length dinoRNAV genome integration. These results corroborate detections of  
427 multiple genomic dinoRNAV EVEs in scaffold-scale assemblies of *Symbiodinium*  
428 *microadriaticum* genomes (Supplemental Figure 2). The higher-resolution *S. microadriaticum*  
429 chromosome-level assembly facilitated the identification of an additional dinoRNAV genomic  
430 EVE ( $n=4$  for chromosome-level vs.  $n=3$  for scaffold-level, Supplemental Figure 2), two of  
431 which were identified on Chromosome 74 and were separated by 2,501 nucleotides. Of note,  
432 Nand et al. (2021) reported a decreasing abundance and expression of genes towards the center  
433 of chromosomes (past  $\sim 2$ Mpb of a telomere), where there was an increase in repetitive elements;  
434 this is where 26 of 29 putative dinoRNAV EVEs were identified in the chromosome-level  
435 assembly. Furthermore, ORFs neighboring integrations often varied widely both in proximity  
436 and predicted function: from collagen and RNA binding protein to reverse transcriptase and non-  
437 LTR retrotransposable elements, these ORFs potentially contributed to the integration of the  
438 putative dinoRNAV EVEs.

439 Host-provisioned retroelements are a proposed mechanism of non-retroviral RNA virus  
440 endogenization (Horie et al, 2010, Flynn & Moreau 2019). We examined the annotated ORFs  
441 surrounding dinoRNAV-like sequences on the 18 EVE-containing *S. microadriaticum*  
442 chromosomes to gain insight into the integration of dinoRNAVs. *Symbiodinium* contain  
443 numerous long interspersed nuclear elements (LINEs) relative to other Symbiodiniaceae genera,  
444 with LINEs comprising 74.10-171.31 Mbp of *Symbiodinium* genomes, relative to an average of  
445 7.48 Mbp of the genomes of in other genera (González-Pech et al. 2021, Nand et al. 2021, Mita  
446 and Boeke 2016). This group of non-long terminal repeat (non-LTR) eukaryotic retrotransposons  
447 contains reverse transcriptases and is conserved, implying that they are active and may facilitate  
448 non-retroviral endogenization of dinoRNAVs within Symbiodiniaceae. Proximal to putative  
449 dinoRNAV *MCP* and *RdRp* ORFs on *S. microadriaticum* chromosomes,  $\sim 40\%$  of annotated  
450 ORFs (35 of 88 annotated proteins) were similar to non-LTR retrotransposable elements seen in  
451 other eukaryotic genomes (Figure 4, Supplemental table 6), sometimes  $<300$ bp 5' upstream. We  
452 also annotated ORFs similar to hypothetical virus proteins, suggesting that this mechanism may  
453 facilitate integration of sequences beyond dinoRNAVs. These observations of non-LTR  
454 retrotransposable elements, sometimes in very close proximity to dinoRNAV EVEs, supports the  
455 hypothesis of cis-acting host-driven integration and may explains the increased abundance of  
456 dinoRNAV EVEs, particularly in *Symbiodinium* genomes.

457  
458



459  
460

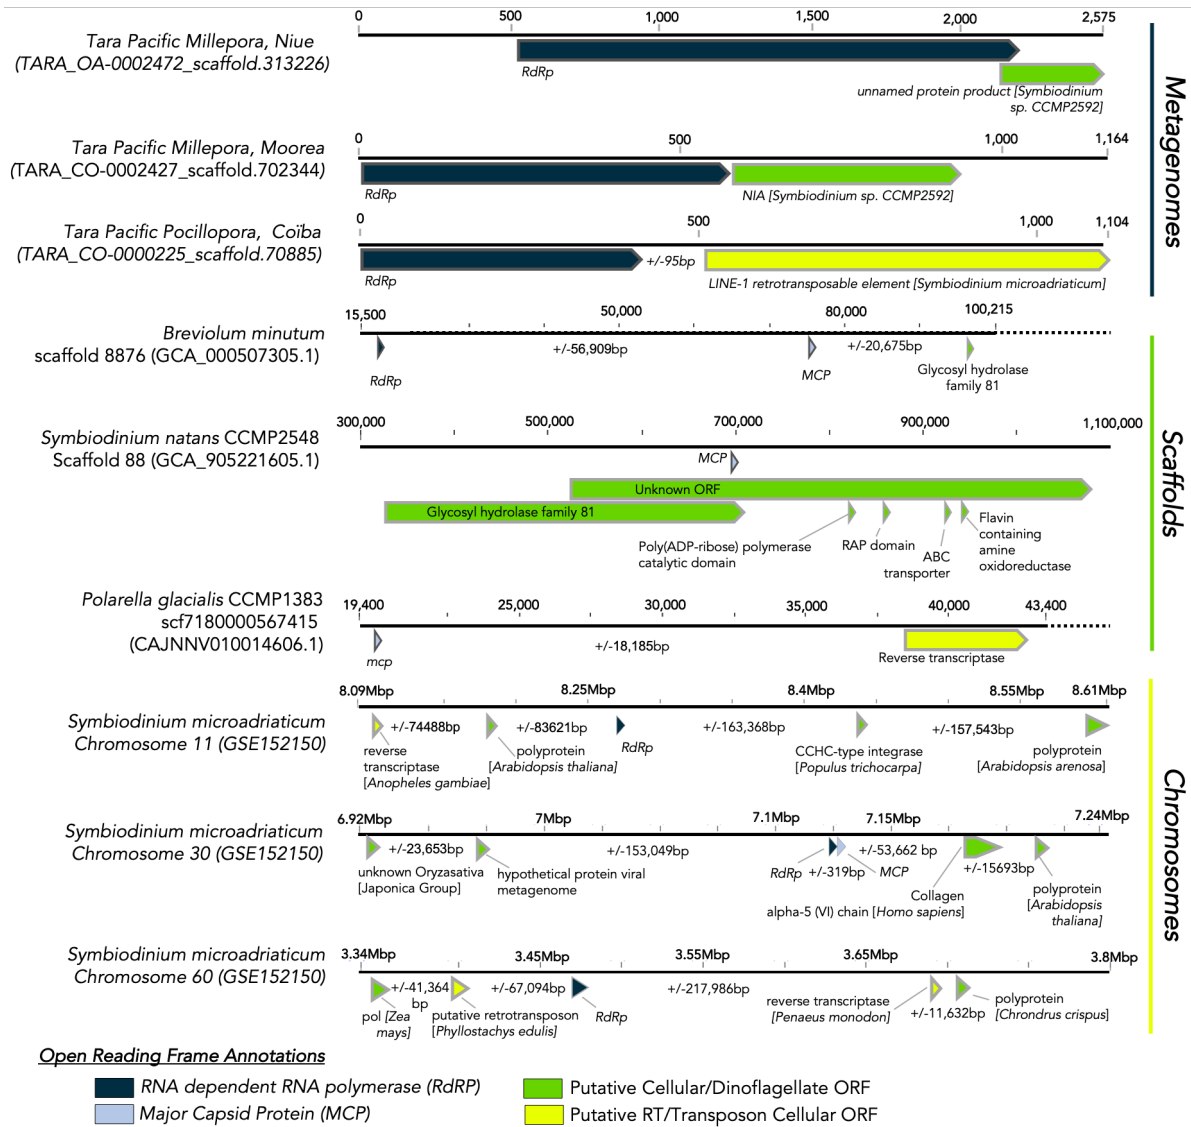

461  
462  
463  
464  
465

**Figure 4.** Representative scaffolds and chromosome fragments containing putative dinorNAV EVEs (*MCP*, light blue; *RdRp*, navy blue ORFs with complete description in supplemental table 6). Open reading frame (ORF) color broadly indicates cellular versus putative +ssRNA viral homology; yellow ORFs may be exploited mechanisms for viral integration. (+/-) base pair values represent sequence lengths between ORFs.

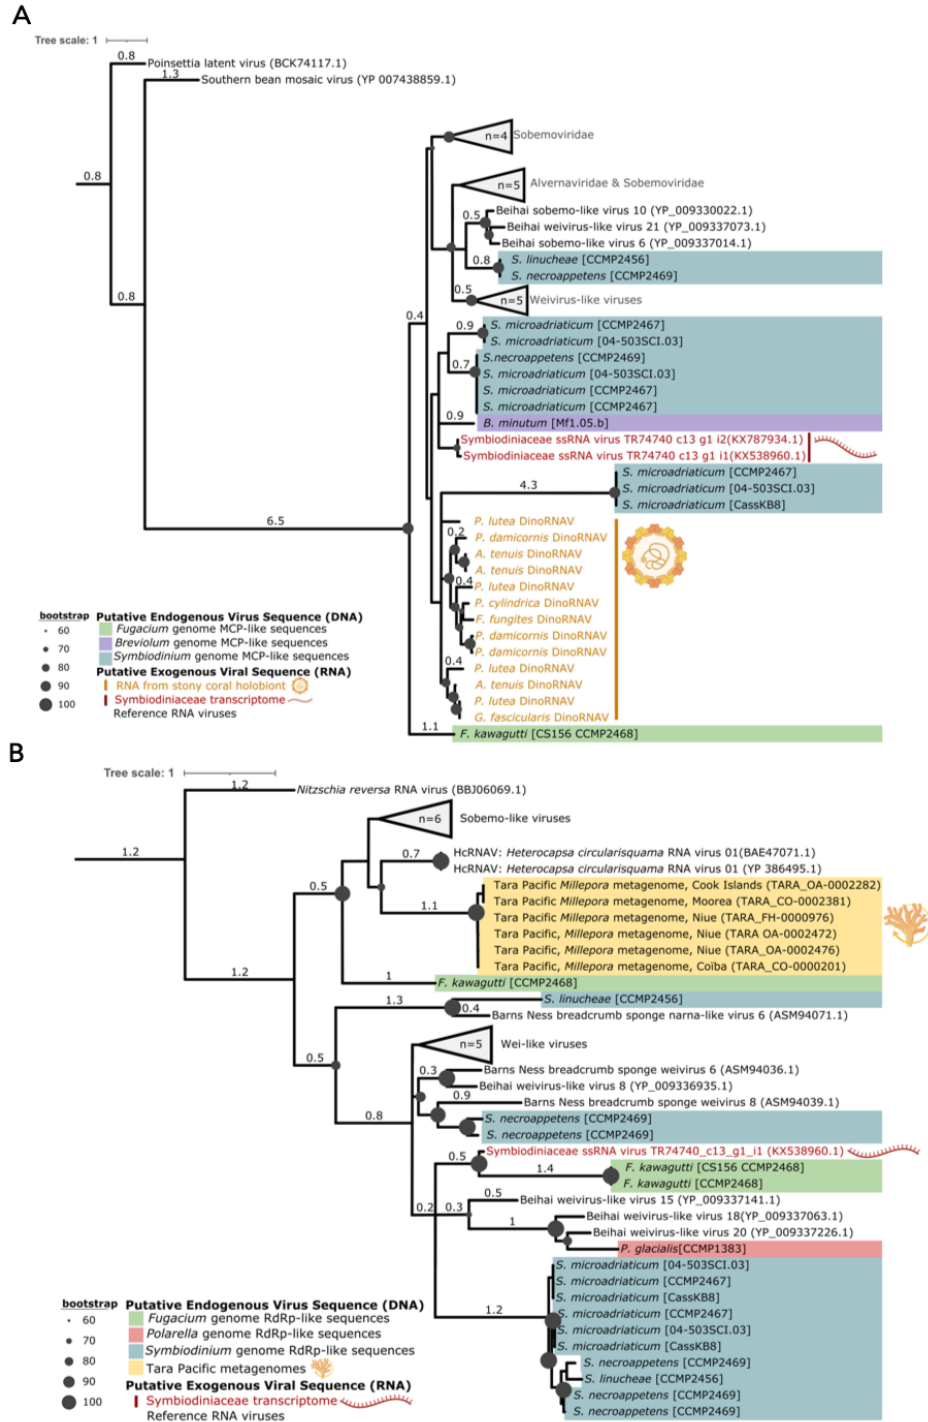

466  
467  
468  
469  
470  
471  
472  
473  
474  
475

476

477 *DinoRNAV EVEs Show Homology to Extant Exogenous Viruses*

478 Endogenized viruses can lend insight into the dynamics between cellular hosts and  
479 extant, free virions. Because many EVEs evolve at the rate of the host genome, rather than at the  
480 much faster rate of exogenous +ssRNA viral genomes, EVEs can serve as a snapshot of viral  
481 ancestry (Holmes et al. 2010). We compared translated putative dinoRNAV EVEs from this  
482 study to putative exogenous dinoRNAVs and extant *Dinornavirus* taxa to better understand if the  
483 former were highly conserved sequences (with potential utility to the host) and/or recently  
484 integrated EVEs. We found that amino acid translations of endogenous dinoRNAV *MCP*  
485 sequences contained conserved motifs observed in the exogenous *MCP* sequences (e.g. regions  
486 1-3 in Figure 3), yet the associated phylogeny was highly polyphyletic along inferred ancestral  
487 nodes (Figure 5A, B). Several putative dinoRNAV EVEs shared similarity to extant *MCPs*  
488 identified from unfractionated stony coral holobionts via amplicon sequencing (Montalvo-  
489 Proaño et al. 2017); these sequences formed an independent, disorganized clade (Figure 5A clade  
490 containing yellow and blue sequences), relative to those recovered from dinoflagellate genomes  
491 or other invertebrate hosts. *MCP* and *RdRp* ORFs putatively derived from the same  
492 dinoflagellate genomes often shared clades (clades containing multiple blue or green sequences  
493 in Figure 5A, B), perhaps indicative of duplications within genomes or multiple integration  
494 events of particular dinoRNAV lineages within host genera. Symbiodiniaceae first diversified  
495 from the psychrophilic, free-living *Polarella* outgroup ~160 million years ago (Janouškovec et  
496 al. 2017, Stephens et al. 2020; LaJeunesse et al. 2018). The detection of putative dinoRNAV  
497 *RdRp* ORFs within *Polarella* genomes is therefore indicative of either the antiquity of  
498 dinoRNAV-dinoflagellate interactions and/or a propensity for dinoRNAV integration across  
499 Dinophyceae families. However, the exclusion of the *P. glacialis* dinoRNAV-*RdRp* from *RdRps*  
500 of other dinoflagellate clades (pink, Figure 5B) further illustrates the congruence between EVEs  
501 and their host genomes.

502 The expression and functional potential of endogenized dinoRNAVs (if any) remains  
503 unclear. Two transcripts derived from *Cladocopium* transcriptomes and annotated as *MCP* ORFs  
504 of +ssRNA viral sequences ('TR74740\_c13-g1\_i1' and 'TR74740\_c13-g1\_i2', Levin et al. 2017,  
505 red text in Figure 5A) shared a clade with putative *Symbiodinium* dinoRNAV EVEs. Likewise,  
506 the *RdRp* ORF of 'TR74740\_c13-g1\_i1' and the *RdRp* of 'GAKY01194223.1'—a transcript  
507 derived from a cultured *Symbiodinium microadriaticum* A1 transcriptome—shared similarity to  
508 putative endogenous dinoRNAVs (Figure 5B; Levin et al. 2017, Baumgarten et al. 2013).  
509 Importantly, both RNA transcripts also shared features characteristic of dinoflagellates, such as a  
510 5' spliced leader sequence ("DinoSL"; Zhang et al. 2013) or dinoflagellate sequence space  
511 flanking the dinoRNAV itself (Baumgarten et al. 2013). While 'TR74740\_c13-g1\_i1' appeared  
512 to be in the top 0.03% of expressed transcripts at under certain thermal conditions,  
513 GAKY01194223.1 appeared exhibit moderately differential expression at the extremes of  
514 temperature and ionic stress in a cultured host (Levin et al. 2017, Baumgarten et al. 2013).

515 While viral *RdRps* have been leveraged by eukaryotes in multiple pathways (Lipardi and  
516 Paterson 2010), the fragmented nature of the putative dinoRNAV EVEs *in silico* may contribute  
517 to a role in triggering antiviral mechanisms in their hosts (Blair et al. 2020, Suzuki et al. 2020).  
518 Given that the *Symbiodinium* genome contains all core RNAi protein machinery, including  
519 Argonaute and Dicer, and that GAKY01194223.1 folds into several hairpins ( $\Delta G = -$   
520 142.5kcal/mol; Supplemental Figure 4 examples), Symbiodiniaceae may use the putative EVE  
521 ncRNA identified here to develop host immunity against extant, exogenous dinoRNAVs.

522 Furthermore, *S. microadriaticum* harboring dinoRNAV EVEs contained numerous non-retroviral  
523 EVEs of other viral families (Supplemental Figure 5) in close proximity, such as *Herpesviridae*,  
524 *Baculoviridae*, *Poxviridae*, *Iridoviridae*, *Phycodnaviridae*, *Pandoraviridae* and *Pithoviridae*,  
525 ssDNA viruses of the family *Shotokuvirae*, -ssRNA viruses from the family *Rhabdoviridae* and  
526 +ssRNA viruses from the family *Coronaviridae* (Supplemental Figure 5). Tara Pacific  
527 metagenomes corroborate findings of similar *RdRps* from these viral families (Supplemental  
528 Figure 5).

529

## 530 **Conclusions**

531

532 Endogenized viral elements, such as dinoRNAVs, demonstrate how *in silico*  
533 identification can provide context for viral genomes in non-model, symbiotic systems such as  
534 coral holobionts, impacting how we study coral reefs and their viral consortia. Endogenized viral  
535 elements (EVEs) have been effectively utilized in many terrestrial systems to better understand  
536 the evolutionary history of viruses (“paleovirology”) and pair hosts with extant viruses in  
537 multipartite systems. We propose that dinoRNAVs utilize host-provisioned mechanisms (e.g.,  
538 LINEs) to integrate into single-celled dinoflagellate genomes as EVEs. We detected heritable  
539 integrations of multiple putative dinoRNAV genes in Symbiodiniaceae scaffolds from cnidarian  
540 metagenomes, as well as in diverse genomes of cultured Symbiodiniaceae; no integrations were  
541 detected from seawater metagenomes nor diverse aposymbiotic cnidarian genomes. The apparent  
542 pervasive nature of dinoRNAV-like sequences among dinoflagellate genomes (especially the  
543 genus *Symbiodinium*) suggests widespread and recurrent/ancestral integration and conservation  
544 of these EVEs. The findings presented in this study further validate the dinoRNAV-  
545 Symbiodiniaceae virus-host pair, enhancing our understanding of ecologically and economically  
546 important cnidarian holobionts and opening the door to examining the role of EVEs in reef  
547 health.

548

## 549 **Data Availability**

550 Metadata and sequences are accessible in zenodo:

551 <https://zenodo.org/communities/tarapacific?page=1&size=20>

552

## 553 **Acknowledgements and Contributions**

554 Special thanks to the Tara Ocean Foundation, the R/V Tara crew and the Tara Pacific Expedition  
555 Participants (<https://doi.org/10.5281/zenodo.3777760>). We are keen to thank the commitment of  
556 the following institutions for their financial and scientific support that made this unique Tara  
557 Pacific Expedition possible: CNRS, PSL, CSM, EPHE, Genoscope, CEA, Inserm, Université  
558 Côte d’Azur, ANR, agnès b., UNESCO-IOC, the Veolia Foundation, the Prince Albert II de  
559 Monaco Foundation, Région Bretagne, Billerudkorsnas, AmerisourceBergen Company, Lorient  
560 Agglomération, Oceans by Disney, L’Oréal, Biotherm, France Collectivités, Fonds Français pour  
561 l’Environnement Mondial (FFEM), Etienne Bourgois, and the Tara Ocean Foundation teams.  
562 Tara Pacific would not exist without the continuous support of the participating institutes.  
563 This research is further supported by NSF OCE #1635798 to AMSC, NSF DOB Grant 2025457  
564 to RLVT, and with additional support from NSF PRFB – 1907184 to KSIB.

565

566

567 **List of Tara Pacific Consortium Coordinators**

- 568
- 569 Sylvain Agostini (orcid.org/0000-0001-9040-9296) Shimoda Marine Research Center,  
570 University of Tsukuba, 5-10-1, Shimoda, Shizuoka, Japan
- 571 Denis Allemand (orcid.org/0000-0002-3089-4290) Centre Scientifique de Monaco, 8 Quai  
572 Antoine Ier, MC-98000, Principality of Monaco
- 573 Bernard Banaigs (orcid.org/0000-0003-3473-4283) PSL Research University: EPHE-UPVD-  
574 CNRS, USR 3278 CRIOBE, Université de Perpignan, France
- 575 Emilie Boissin (orcid.org/0000-0002-4110-790X) PSL Research University: EPHE-UPVD-  
576 CNRS, USR 3278 CRIOBE, Laboratoire d'Excellence CORAIL, Université de  
577 Perpignan, 52 Avenue Paul Alduy, 66860 Perpignan Cedex, France
- 578 Emmanuel Boss (orcid.org/0000-0002-8334-9595) School of Marine Sciences, University of  
579 Maine, Orono, 04469, Maine, USA
- 580 Chris Bowler (orcid.org/0000-0003-3835-6187) Institut de Biologie de l'Ecole Normale  
581 Supérieure (IBENS), Ecole normale supérieure, CNRS, INSERM, Université PSL, 75005  
582 Paris, France
- 583 Colomban de Vargas (orcid.org/0000-0002-6476-6019) Sorbonne Université, CNRS, Station  
584 Biologique de Roscoff, AD2M, UMR 7144, ECOMAP 29680 Roscoff, France &  
585 Research Federation for the study of Global Ocean Systems Ecology and Evolution,  
586 FR2022/ Tara Oceans-GOSEE, 3 rue Michel-Ange, 75016 Paris, France
- 587 Eric Douville (orcid.org/0000-0002-6673-1768) Laboratoire des Sciences du Climat et de  
588 l'Environnement, LSCE/IPSL, CEA-CNRS-UVSQ, Université Paris-Saclay, F-91191  
589 Gif-sur-Yvette, France
- 590 Michel Flores (orcid.org/0000-0003-3609-286X) Weizmann Institute of Science, Department of  
591 Earth and Planetary Sciences, 76100 Rehovot, Israel
- 592 Didier Forcioli (orcid.org/0000-0002-5505-0932) Université Côte d'Azur, CNRS, INSERM,  
593 IRCAN, Medical School, Nice, France and Department of Medical Genetics, CHU of  
594 Nice, France
- 595 Paola Furla (orcid.org/0000-0001-9899-942X) Université Côte d'Azur, CNRS, INSERM,  
596 IRCAN, Medical School, Nice, France and Department of Medical Genetics, CHU of  
597 Nice, France
- 598 Pierre Galand (orcid.org/0000-0002-2238-3247) Sorbonne Université, CNRS, Laboratoire  
599 d'Ecogéochimie des Environnements Benthiques (LECOB), Observatoire Océanologique  
600 de Banyuls, 66650 Banyuls sur mer, France
- 601 Eric Gilson (orcid.org/0000-0001-5738-6723) Université Côte d'Azur, CNRS, Inserm, IRCAN,  
602 France
- 603 Fabien Lombard (orcid.org/0000-0002-8626-8782) Sorbonne Université, Institut de la Mer de  
604 Villefranche sur mer, Laboratoire d'Océanographie de Villefranche, F-06230  
605 Villefranche-sur-Mer, France
- 606 Stéphane Pesant (orcid.org/0000-0002-4936-5209) European Molecular Biology Laboratory,  
607 European Bioinformatics Institute, Wellcome Genome Campus, Hinxton, Cambridge  
608 CB10 1SD, UK
- 609 Serge Planes (orcid.org/0000-0002-5689-5371) PSL Research University: EPHE-UPVD-CNRS,  
610 USR 3278 CRIOBE, Laboratoire d'Excellence CORAIL, Université de Perpignan, 52  
611 Avenue Paul Alduy, 66860 Perpignan Cedex, France



612 Stéphanie Reynaud (orcid.org/0000-0001-9975-6075) Centre Scientifique de Monaco, 8 Quai  
613 Antoine Ier, MC-98000, Principality of Monaco  
614 Matthew B. Sullivan (orcid.org/0000-0003-4040-9831) The Ohio State University, Departments  
615 of Microbiology and Civil, Environmental and Geodetic Engineering, Columbus, Ohio,  
616 43210 USA  
617 Shinichi Sunagawa (orcid.org/0000-0003-3065-0314) Department of Biology, Institute of  
618 Microbiology and Swiss Institute of Bioinformatics, Vladimir-Prelog-Weg 4, ETH  
619 Zürich, CH-8093 Zürich, Switzerland  
620 Olivier Thomas (orcid.org/0000-0002-5708-1409) Marine Biodiscovery Laboratory, School of  
621 Chemistry and Ryan Institute, National University of Ireland, Galway, Ireland  
622 Romain Troublé (ORCID not-available) Fondation Tara Océan, Base Tara, 8 rue de Prague, 75  
623 012 Paris, France  
624 Rebecca Vega Thurber (orcid.org/0000-0003-3516-2061) Oregon State University, Department  
625 of Microbiology, 220 Nash Hall, 97331 Corvallis OR USA  
626 Christian R. Voolstra (orcid.org/0000-0003-4555-3795) Department of Biology, University of  
627 Konstanz, 78457 Konstanz, Germany  
628 Patrick Wincker (orcid.org/0000-0001-7562-3454) Génomique Métabolique, Genoscope, Institut  
629 François Jacob, CEA, CNRS, Univ Evry, Université Paris-Saclay, 91057 Evry, France  
630 Didier Zoccola (orcid.org/0000-0002-1524-8098) Centre Scientifique de Monaco, 8 Quai  
631 Antoine Ier, MC-98000, Principality of Monaco  
632

## 633 References

- 634 Aiewsakun, P., & Katzourakis, A. (2015). Endogenous viruses: Connecting recent and ancient viral  
635 evolution. *Virology*, 479–480, 26–37. <https://doi.org/10.1016/j.virol.2015.02.011>
- 636 Altschul, S. F., Gish, W., Miller, W., Myers, E. W., & Lipman, D. J. (1990). Basic local alignment  
637 search tool. *Journal of Molecular Biology*, 215(3), 403–410. [https://doi.org/10.1016/S0022-](https://doi.org/10.1016/S0022-2836(05)80360-2)  
638 2836(05)80360-2
- 639 Aranda, M., Li, Y., Liew, Y. J., Baumgarten, S., Simakov, O., Wilson, M. C., Piel, J., Ashoor, H.,  
640 Bougouffa, S., Bajic, V. B., Ryu, T., Ravasi, T., Bayer, T., Micklem, G., Kim, H., Bhak, J.,  
641 LaJeunesse, T. C., & Voolstra, C. R. (2016). Genomes of coral dinoflagellate symbionts  
642 highlight evolutionary adaptations conducive to a symbiotic lifestyle. *Scientific Reports*, 6(1),  
643 39734. <https://doi.org/10.1038/srep39734>
- 644 Ballinger, M. J., Bruenn, J. A., & Taylor, D. J. (2012). Phylogeny, integration and expression of  
645 sigma virus-like genes in *Drosophila*. *Molecular Phylogenetics and Evolution*, 65(1), 251–258.  
646 <https://doi.org/10.1016/j.ympev.2012.06.008>
- 647 Baumgarten, S., Bayer, T., Aranda, M., Liew, Y. J., Carr, A., Micklem, G., & Voolstra, C. R.  
648 (2013). Integrating microRNA and mRNA expression profiling in *Symbiodinium*  
649 *microadriaticum*, a dinoflagellate symbiont of reef-building corals. *BMC Genomics*, 14(1), 704.  
650 <https://doi.org/10.1186/1471-2164-14-704>
- 651 Bigot, T., Temmam, S., Pérot, P., & Eloit, M. (2020). RVDB-prot, a reference viral protein  
652 database and its HMM profiles. *F1000 Research*, 8, 530.  
653 <https://doi.org/10.12688/f1000research.18776.2>

- 654 Blair, C. D., Olson, K. E., & Bonizzoni, M. (2020). The Widespread occurrence and potential  
655 biological roles of endogenous viral elements in insect genomes. *Current Issues in Molecular*  
656 *Biology*, 13–30. <https://doi.org/10.21775/cimb.034.013>
- 657 Buchfink, B., Xie, C., & Huson, D. H. (2015). Fast and sensitive protein alignment using  
658 DIAMOND. *Nature Methods*, 12(1), 59–60. <https://doi.org/10.1038/nmeth.3176>
- 659 Bushnell, B., Rood, J., & Singer, E. (2017). BBMerge – Accurate paired shotgun read merging via  
660 overlap. *PLOS ONE*, 12(10), e0185056. <https://doi.org/10.1371/journal.pone.0185056>
- 661 Chiba, S., Kondo, H., Tani, A., Saisho, D., Sakamoto, W., Kanematsu, S., & Suzuki, N. (2011).  
662 Widespread endogenization of genome sequences of non-retroviral RNA viruses into plant  
663 genomes. *PLOS Pathogens*, 7(7), e1002146. <https://doi.org/10.1371/journal.ppat.1002146>
- 664 Chu, H., Jo, Y., & Cho, W. K. (2014). Evolution of endogenous non-retroviral genes integrated into  
665 plant genomes. *Current Plant Biology*, 1, 55–59. <https://doi.org/10.1016/j.cpb.2014.07.002>
- 666 Correa, A. M. S., Ainsworth, T. D., Rosales, S. M., Thurber, A. R., Butler, C. R., & Vega Thurber,  
667 R. L. (2016). Viral outbreak in corals associated with an *in situ* bleaching event: atypical herpes-  
668 like viruses and a new Megavirus infecting *Symbiodinium*. *Frontiers in Microbiology*, 7.  
669 <https://doi.org/10.3389/fmicb.2016.00127>
- 670 Correa, A. M. S., Howard-Varona, C., Coy, S. R., Buchan, A., Sullivan, M. B., & Weitz, J. S.  
671 (2021). Revisiting the rules of life for viruses of microorganisms. *Nature Reviews Microbiology*,  
672 19(8), 501–513. <https://doi.org/10.1038/s41579-021-00530-x>
- 673 Correa, A. M. S., Welsh, R. M., & Vega Thurber, R. L. (2013). Unique nucleocytoplasmic dsDNA  
674 and +ssRNA viruses are associated with the dinoflagellate endosymbionts of corals. *The ISME*  
675 *Journal*, 7(1), 13–27. <https://doi.org/10.1038/ismej.2012.75>

676 Feschotte, C., & Gilbert, C. (2012). Endogenous viruses: insights into viral evolution and impact on  
677 host biology. *Nature Reviews Genetics*, *13*(4), 283–296. <https://doi.org/10.1038/nrg3199>

678 Flynn, P. J., & Moreau, C. S. (2019). Assessing the diversity of endogenous viruses throughout ant  
679 genomes. *Frontiers in Microbiology*, *10*, 1139. <https://doi.org/10.3389/fmicb.2019.01139>

680 Frank, J. A., & Feschotte, C. (2017). Co-option of endogenous viral sequences for host cell  
681 function. *Current Opinion in Virology*, *25*, 81–89. <https://doi.org/10.1016/j.coviro.2017.07.021>

682 Fujise, L., Suggett, D. J., Stat, M., Kahlke, T., Bunce, M., Gardner, S. G., Goyen, S., Woodcock,  
683 S., Ralph, P. J., Seymour, J. R., Siboni, N., & Nitschke, M. R. (2021). Unlocking the  
684 phylogenetic diversity, primary habitats, and abundances of free-living Symbiodiniaceae on a  
685 coral reef. *Molecular Ecology*, *30*(1), 343–360. <https://doi.org/10.1111/mec.15719>

686 Gallot-Lavallée, L., & Blanc, G. (2017). A Glimpse of Nucleo-Cytoplasmic Large DNA Virus  
687 biodiversity through the eukaryotic genomics window. *Viruses*, *9*(1), 17.  
688 <https://doi.org/10.3390/v9010017>

689 Glynn, P. W. (1996). Coral reef bleaching: facts, hypotheses and implications. *Global Change*  
690 *Biology*, *2*(6), 495–509. <https://doi.org/10.1111/j.1365-2486.1996.tb00063.x>

691 González-Pech, R. A., Chen, Y., Stephens, T. G., Shah, S., Mohamed, A. R., Lagorce, R.,  
692 Bhattacharya, D., Ragan, M. A., & Chan, C. X. (2019). *Genomes of Symbiodiniaceae reveal*  
693 *extensive sequence divergence but conserved functions at family and genus levels* [Preprint].  
694 Genomics. <https://doi.org/10.1101/800482>

695 González-Pech, R. A., Stephens, T. G., Chen, Y., Mohamed, A. R., Cheng, Y., Shah, S., Dougan,  
696 K. E., Fortuin, M. D. A., Lagorce, R., Burt, D. W., Bhattacharya, D., Ragan, M. A., & Chan, C.  
697 X. (2021). Comparison of 15 dinoflagellate genomes reveals extensive sequence and structural

- 698 divergence in family Symbiodiniaceae and genus *Symbiodinium*. *BMC Biology*, 19(1), 73.  
699 <https://doi.org/10.1186/s12915-021-00994-6>
- 700 Grupstra, C. G. B., Rabbitt, K. M., Howe-Kerr, L. I., & Correa, A. M. S. (2021). Fish predation on  
701 corals promotes the dispersal of coral symbionts. *Animal Microbiome*, 3(1), 25.  
702 <https://doi.org/10.1186/s42523-021-00086-4>
- 703 Grupstra, C. G. B., L. I. Howe-Kerr, A. J. Veglia, R. L. Bryant, S. R. Coy, P. L. Blackwelder and  
704 A. M. S. Correa (2022). Thermal stress triggers productive viral infection of a key coral reef  
705 symbiont. *The ISME Journal*. 10.1038/s41396-022-01194-y
- 706 Gurevich, A., Saveliev, V., Vyahhi, N., & Tesler, G. (2013). QUASt: quality assessment tool for  
707 genome assemblies. *Bioinformatics*, 29(8), 1072–1075.  
708 <https://doi.org/10.1093/bioinformatics/btt086>
- 709 Harrison, E., & Brockhurst, M. A. (2017). Ecological and evolutionary benefits of temperate phage:  
710 what does or doesn't kill you makes you stronger. *BioEssays*, 39(12), 1700112.  
711 <https://doi.org/10.1002/bies.201700112>
- 712 Hoang, D. T., Chernomor, O., von Haeseler, A., Minh, B. Q., & Vinh, L. S. (2018). UFBoot2:  
713 improving the ultrafast bootstrap approximation. *Molecular Biology and Evolution*, 35(2), 518–  
714 522. <https://doi.org/10.1093/molbev/msx281>
- 715 Holmes, E. C. (2011). The evolution of endogenous viral elements. *Cell Host & Microbe*, 10(4),  
716 368–377. <https://doi.org/10.1016/j.chom.2011.09.002>
- 717 Holt, C., & Yandell, M. (2011). MAKER2: an annotation pipeline and genome-database  
718 management tool for second-generation genome projects. *BMC Bioinformatics*, 12(1), 491.  
719 <https://doi.org/10.1186/1471-2105-12-491>



720 Horie, M., Honda, T., Suzuki, Y., Kobayashi, Y., Daito, T., Oshida, T., Ikuta, K., Jern, P.,  
721 Gojobori, T., Coffin, J. M., & Tomonaga, K. (2010). Endogenous non-retroviral RNA virus  
722 elements in mammalian genomes. *Nature*, *463*(7277), 84–87.  
723 <https://doi.org/10.1038/nature08695>

724 Hume, B. C. C., Smith, E. G., Ziegler, M., Warrington, H. J. M., Burt, J. A., LaJeunesse, T. C.,  
725 Wiedenmann, J., & Voolstra, C. R. (2019). SymPortal: A novel analytical framework and  
726 platform for coral algal symbiont next-generation sequencing *ITS2* profiling. *Molecular Ecology*  
727 *Resources*, *19*(4), 1063–1080. <https://doi.org/10.1111/1755-0998.13004>

728 Hume, Benjamin C.C., Poulain, Julie, Pesant, Stéphane, Belser, Caroline, Ruscheweyh, Hans-  
729 Joachim, Moulin, Clémentine, Boissin, Emilie, Bourdin, Guillaume, Iwankow, Guillaume,  
730 Romac, Sarah, Agostini, Sylvain, Banaigs, Bernard, Boss, Emmanuel, Bowler, Chris, de Vargas,  
731 Colomban, Douville, Eric, Flores, J. Michel, Forcioli, Didier, Furla, Paola, ... Voolstra, Christian  
732 R. (2020). Tara Pacific metabarcoding sequencing (16S, 18S, ITS2) reference & replication  
733 tables version 1 (Version 1) [Data set]. Zenodo. <https://doi.org/10.5281/zenodo.4073035>

734 Hyatt, D., Chen, G.-L., LoCascio, P. F., Land, M. L., Larimer, F. W., & Hauser, L. J. (2010).  
735 Prodigal: prokaryotic gene recognition and translation initiation site identification. *BMC*  
736 *Bioinformatics*, *11*(1), 119. <https://doi.org/10.1186/1471-2105-11-119>

737 Janouškovec, J., Gavelis, G. S., Burki, F., Dinh, D., Bachvaroff, T. R., Gornik, S. G., Bright, K. J.,  
738 Imanian, B., Strom, S. L., Delwiche, C. F., Waller, R. F., Fensome, R. A., Leander, B. S.,  
739 Rohwer, F. L., & Saldarriaga, J. F. (2017). Major transitions in dinoflagellate evolution unveiled  
740 by phylotranscriptomics. *Proceedings of the National Academy of Sciences*, *114*(2), E171–E180.  
741 <https://doi.org/10.1073/pnas.1614842114>

- 742 Jebb, D., Huang, Z., Pippel, M., Hughes, G. M., Lavrichenko, K., Devanna, P., Winkler, S.,  
743 Jermin, L. S., Skirmuntt, E. C., Katzourakis, A., Burkitt-Gray, L., Ray, D. A., Sullivan, K. A.  
744 M., Roscito, J. G., Kirilenko, B. M., Dávalos, L. M., Corthals, A. P., Power, M. L., Jones, G., ...  
745 Teeling, E. C. (2020). Six reference-quality genomes reveal evolution of bat adaptations. *Nature*,  
746 583(7817), 578–584. <https://doi.org/10.1038/s41586-020-2486-3>
- 747 Jern, P., & Coffin, J. M. (2008). Effects of Retroviruses on Host Genome Function. *Annual Review*  
748 *of Genetics*, 42(1), 709–732. <https://doi.org/10.1146/annurev.genet.42.110807.091501>
- 749 Johnson, W. E. (2010). Endless Forms Most Viral. *PLoS Genetics*, 6(11), e1001210.  
750 <https://doi.org/10.1371/journal.pgen.1001210>
- 751 Johnson, W. E. (2015). Endogenous retroviruses in the genomics era. *Annual Review of Virology*,  
752 2(1), 135–159. <https://doi.org/10.1146/annurev-virology-100114-054945>
- 753 Johnson, W. E. (2019). Origins and evolutionary consequences of ancient endogenous retroviruses.  
754 *Nature Reviews Microbiology*, 17(6), 355–370. <https://doi.org/10.1038/s41579-019-0189-2>
- 755 Kalyaanamoorthy, S., Minh, B. Q., Wong, T. K. F., von Haeseler, A., & Jermin, L. S. (2017).  
756 ModelFinder: fast model selection for accurate phylogenetic estimates. *Nature Methods*, 14(6),  
757 587–589. <https://doi.org/10.1038/nmeth.4285>
- 758 Katoh, K., & Standley, D. M. (2013). MAFFT Multiple Sequence Alignment Software Version 7:  
759 improvements in performance and usability. *Molecular Biology and Evolution*, 30(4), 772–780.  
760 <https://doi.org/10.1093/molbev/mst010>
- 761 Katzourakis, A. (2013). Paleovirology: inferring viral evolution from host genome sequence data.  
762 *Philosophical Transactions of the Royal Society B: Biological Sciences*, 368(1626), 20120493.  
763 <https://doi.org/10.1098/rstb.2012.0493>

- 764 Katzourakis, A., & Gifford, R. J. (2010). Endogenous viral elements in animal genomes. *PLOS*  
765 *Genetics*, 6(11), e1001191. <https://doi.org/10.1371/journal.pgen.1001191>
- 766 Knowlton, N., & Rohwer, F. (2003). Multispecies Microbial Mutualisms on Coral Reefs: The Host  
767 as a Habitat. *The American Naturalist*, 162(S4), S51–S62. <https://doi.org/10.1086/378684>
- 768 Kojima, S., Yoshikawa, K., Ito, J., Nakagawa, S., Parrish, N. F., Horie, M., Kawano, S., &  
769 Tomonaga, K. (2021). Virus-like insertions with sequence signatures similar to those of  
770 endogenous nonretroviral RNA viruses in the human genome. *Proceedings of the National*  
771 *Academy of Sciences*, 118(5). <https://doi.org/10.1073/pnas.2010758118>
- 772 Kolekar, P., Pataskar, A., Kulkarni-Kale, U. et al. (2016). IRESPred: Web Server for Prediction of  
773 Cellular and Viral Internal Ribosome Entry Site (IRES). *Sci Rep*, 6:27436.  
774 <https://doi.org/10.1038/srep27436>
- 775 Kumar, S., Stecher, G., & Tamura, K. (2016). MEGA7: molecular evolutionary genetics analysis  
776 version 7.0 for bigger datasets. *Molecular Biology and Evolution*, 33(7), 1870–1874.  
777 <https://doi.org/10.1093/molbev/msw054>
- 778 LaJeunesse, T. C., Parkinson, J. E., Gabrielson, P. W., Jeong, H. J., Reimer, J. D., Voolstra, C. R.,  
779 & Santos, S. R. (2018). Systematic revision of symbiodiniaceae highlights the antiquity and  
780 diversity of coral endosymbionts. *Current Biology*, 28(16), 2570-2580.e6.  
781 <https://doi.org/10.1016/j.cub.2018.07.008>
- 782 Lawrence, S. A., Davy, J. E., Aeby, G. S., Wilson, W. H., & Davy, S. K. (2014). Quantification of  
783 virus-like particles suggests viral infection in corals affected by *Porites* tissue loss. *Coral Reefs*,  
784 33(3), 687–691. <https://doi.org/10.1007/s00338-014-1168-8>

- 785 Levin, R. A., Voolstra, C. R., Weynberg, K. D., & van Oppen, M. J. H. (2017). Evidence for a role  
786 of viruses in the thermal sensitivity of coral photosymbionts. *The ISME Journal*, *11*(3), 808–812.  
787 <https://doi.org/10.1038/ismej.2016.154>
- 788 Lin, S., Cheng, S., Song, B., Zhong, X., Lin, X., Li, W., Li, L., Zhang, Y., Zhang, H., Ji, Z., Cai,  
789 M., Zhuang, Y., Shi, X., Lin, L., Wang, L., Wang, Z., Liu, X., Yu, S., Zeng, P., ... Morse, D.  
790 (2015). The *Symbiodinium kawagutii* genome illuminates dinoflagellate gene expression and  
791 coral symbiosis. *Science*, *350*(6261), 691–694. <https://doi.org/10.1126/science.aad0408>
- 792 Lipardi, C., & Paterson, B. M. (2009). Identification of an RNA-dependent RNA polymerase in  
793 *Drosophila* involved in RNAi and transposon suppression. *Proceedings of the National Academy*  
794 *of Sciences*, *106*(37), 15645–15650. <https://doi.org/10.1073/pnas.0904984106>
- 795 Littman, R. A., van Oppen, M. J. H., & Willis, B. L. (2008). Methods for sampling free-living  
796 *Symbiodinium* (zooxanthellae) and their distribution and abundance at Lizard Island (Great  
797 Barrier Reef). *Journal of Experimental Marine Biology and Ecology*, *364*(1), 48–53.  
798 <https://doi.org/10.1016/j.jembe.2008.06.034>
- 799 Liu, H., Stephens, T. G., González-Pech, R. A., Beltran, V. H., Lapeyre, B., Bongaerts, P., Cooke,  
800 I., Aranda, M., Bourne, D. G., Forêt, S., Miller, D. J., van Oppen, M. J. H., Voolstra, C. R.,  
801 Ragan, M. A., & Chan, C. X. (2018). *Symbiodinium* genomes reveal adaptive evolution of  
802 functions related to coral-dinoflagellate symbiosis. *Communications Biology*, *1*(1), 95.  
803 <https://doi.org/10.1038/s42003-018-0098-3>
- 804 Matthews, J. L., Raina, J., Kahlke, T., Seymour, J. R., Oppen, M. J. H., & Suggett, D. J. (2020).  
805 Symbiodiniaceae-bacteria interactions: rethinking metabolite exchange in reef-building corals as  
806 multi-partner metabolic networks. *Environmental Microbiology*, *22*(5), 1675–1687.  
807 <https://doi.org/10.1111/1462-2920.14918>

808 Messyasz, A., Rosales, S. M., Mueller, R. S., Sawyer, T., Correa, A. M. S., Thurber, A. R., & Vega  
809 Thurber, R. (2020). Coral bleaching phenotypes associated with differential abundances of  
810 Nucleocytoplasmic Large DNA Viruses. *Frontiers in Marine Science*, 7, 555474.  
811 <https://doi.org/10.3389/fmars.2020.555474>

812 Minh, B. Q., Schmidt, H. A., Chernomor, O., Schrempf, D., Woodhams, M. D., von Haeseler, A.,  
813 & Lanfear, R. (2020). IQ-TREE 2: new models and efficient methods for phylogenetic inference  
814 in the genomic era. *Molecular Biology and Evolution*, 37(5), 1530–1534.  
815 <https://doi.org/10.1093/molbev/msaa015>

816 Mita, P., & Boeke, J. D. (2016). How retrotransposons shape genome regulation. *Current Opinion*  
817 *in Genetics & Development*, 37, 90–100. <https://doi.org/10.1016/j.gde.2016.01.001>

818 Moniruzzaman, M., Weinheimer, A. R., Martinez-Gutierrez, C. A., & Aylward, F. O. (2020).  
819 Widespread endogenization of giant viruses shapes genomes of green algae. *Nature*, 588(7836),  
820 141–145. <https://doi.org/10.1038/s41586-020-2924-2>

821 Montalvo-Proano, J., Buerger, P., Weynberg, K. D., & van Oppen, M. J. H. (2017). A PCR-Based  
822 Assay targeting the major capsid protein gene of a Dinornis-Like ssRNA virus that infects coral  
823 photosymbionts. *Frontiers in Microbiology*, 8, 1665. <https://doi.org/10.3389/fmicb.2017.01665>

824 Muller, E. M., Bartels, E., & Baums, I. B. (2018). Bleaching causes loss of disease resistance  
825 within the threatened coral species *Acropora cervicornis*. *ELife*, 7, e35066.  
826 <https://doi.org/10.7554/eLife.35066>

827 Nagasaki, K., Shirai, Y., Takao, Y., Mizumoto, H., Nishida, K., & Tomaru, Y. (2005). Comparison  
828 of genome sequences of single-stranded RNA viruses infecting the bivalve-killing dinoflagellate  
829 *Heterocapsa circularisquama*. *Applied and Environmental Microbiology*, 71(12), 8888–8894.  
830 <https://doi.org/10.1128/AEM.71.12.8888-8894.2005>



- 831 Nand, A., Zhan, Y., Salazar, O. R., Aranda, M., Voolstra, C. R., & Dekker, J. (2021). Genetic and  
832 spatial organization of the unusual chromosomes of the dinoflagellate *Symbiodinium*  
833 *microadriaticum*. *Nature Genetics*, 53(5), 618–629. <https://doi.org/10.1038/s41588-021-00841-y>
- 834 Oliveira, N. M., Satija, H., Kouwenhoven, I. A., & Eiden, M. V. (2007). Changes in viral protein  
835 function that accompany retroviral endogenization. *Proceedings of the National Academy of*  
836 *Sciences*, 104(44), 17506–17511. <https://doi.org/10.1073/pnas.0704313104>
- 837 Palatini, U., Miesen, P., Carballar-Lejarazu, R., Ometto, L., Rizzo, E., Tu, Z., van Rij, R. P., &  
838 Bonizzoni, M. (2017). Comparative genomics shows that viral integrations are abundant and  
839 express piRNAs in the arboviral vectors *Aedes aegypti* and *Aedes albopictus*. *BMC Genomics*,  
840 18(1), 512. <https://doi.org/10.1186/s12864-017-3903-3>
- 841 Parker, B. J., & Brisson, J. A. (2019). A laterally transferred viral gene modifies aphid wing  
842 plasticity. *Current Biology*, 29(12), 2098-2103.e5. <https://doi.org/10.1016/j.cub.2019.05.041>
- 843 Patel, M. R., Emerman, M., & Malik, H. S. (2011). Paleovirology—ghosts and gifts of viruses past.  
844 *Current Opinion in Virology*, 1(4), 304–309. <https://doi.org/10.1016/j.coviro.2011.06.007>
- 845 Pesant, Stéphane, Lombard, Fabien, Bourdin, Guillaume, Poulain, Julie, Petit, Emmanuelle, Boss,  
846 Emmanuel, Cassar, Nicolas, Cohen, Natalie R., Dimier, Céline, Douville, Eric, Flores, J. Michel,  
847 Gorsky, Gabriel, Hume, Benjamin C.C., John, Seth G., Kelly, Rachel L., Lin, Yajuan, Marie,  
848 Dominique, Pedrotti, Maria-Luiza, Pujo Pay, Mireille, ... Allemand, Denis. (2020). *Tara Pacific*  
849 *samples provenance and environmental context - version 1*. Zenodo.  
850 <https://doi.org/10.5281/ZENODO.4068293>
- 851 Quinlan, A. R., & Hall, I. M. (2010). BEDTools: a flexible suite of utilities for comparing genomic  
852 features. *Bioinformatics*, 26(6), 841–842. <https://doi.org/10.1093/bioinformatics/btq033>

- 853 Robbins, S. J., ReFuGe2020 Consortium, Singleton, C. M., Chan, C. X., Messer, L. F., Geers, A.  
854 U., Ying, H., Baker, A., Bell, S. C., Morrow, K. M., Ragan, M. A., Miller, D. J., Forêt, S.,  
855 Voolstra, C. R., Tyson, G. W., & Bourne, D. G. (2019). A genomic view of the reef-building  
856 coral *Porites lutea* and its microbial symbionts. *Nature Microbiology*, 4(12), 2090–2100.  
857 <https://doi.org/10.1038/s41564-019-0532-4>
- 858 Roossinck, M. J. (2011). The good viruses: viral mutualistic symbioses. *Nature Reviews*  
859 *Microbiology*, 9(2), 99–108. <https://doi.org/10.1038/nrmicro2491>
- 860 Scheufen, T., Iglesias-Prieto, R., & Enríquez, S. (2017). Changes in the number of symbionts and  
861 *Symbiodinium* cell pigmentation modulate differentially coral light absorption and  
862 photosynthetic performance. *Frontiers in Marine Science*, 4, 309.  
863 <https://doi.org/10.3389/fmars.2017.00309>
- 864 Shoguchi, E., Beedessee, G., Hisata, K., Tada, I., Narisoko, H., Satoh, N., Kawachi, M., &  
865 Shinzato, C. (2021). A new dinoflagellate genome illuminates a conserved gene cluster involved  
866 in sunscreen biosynthesis. *Genome Biology and Evolution*, 13(2), evaa235.  
867 <https://doi.org/10.1093/gbe/evaa235>
- 868 Shoguchi, E., Beedessee, G., Tada, I., Hisata, K., Kawashima, T., Takeuchi, T., Arakaki, N., Fujie,  
869 M., Koyanagi, R., Roy, M. C., Kawachi, M., Hidaka, M., Satoh, N., & Shinzato, C. (2018). Two  
870 divergent *Symbiodinium* genomes reveal conservation of a gene cluster for sunscreen  
871 biosynthesis and recently lost genes. *BMC Genomics*, 19(1), 458.  
872 <https://doi.org/10.1186/s12864-018-4857-9>
- 873 Shoguchi, E., Shinzato, C., Kawashima, T., Gyoja, F., Mungpakdee, S., Koyanagi, R., Takeuchi,  
874 T., Hisata, K., Tanaka, M., Fujiwara, M., Hamada, M., Seidi, A., Fujie, M., Usami, T., Goto, H.,  
875 Yamasaki, S., Arakaki, N., Suzuki, Y., Sugano, S., ... Satoh, N. (2013). Draft assembly of the

876 *Symbiodinium minutum* nuclear genome reveals dinoflagellate gene structure. *Current Biology*,  
877 23(15), 1399–1408. <https://doi.org/10.1016/j.cub.2013.05.062>

878 Sievers, F., Wilm, A., Dineen, D., Gibson, T. J., Karplus, K., Li, W., Lopez, R., McWilliam, H.,  
879 Remmert, M., Söding, J., Thompson, J. D., & Higgins, D. G. (2011). Fast, scalable generation of  
880 high-quality protein multiple sequence alignments using Clustal Omega. *Molecular Systems  
881 Biology*, 7(1), 539. <https://doi.org/10.1038/msb.2011.75>

882 Simão, F. A., Waterhouse, R. M., Ioannidis, P., Kriventseva, E. V., & Zdobnov, E. M. (2015).  
883 BUSCO: assessing genome assembly and annotation completeness with single-copy orthologs.  
884 *Bioinformatics*, 31(19), 3210–3212. <https://doi.org/10.1093/bioinformatics/btv351>

885 Skirmuntt, E. C., Escalera-Zamudio, M., Teeling, E. C., Smith, A., & Katzourakis, A. (2020). The  
886 potential role of Endogenous Viral Elements in the evolution of bats as reservoirs for zoonotic  
887 viruses. *Annual Review of Virology*, 7(1), 103–119. [https://doi.org/10.1146/annurev-virology-  
888 092818-015613](https://doi.org/10.1146/annurev-virology-092818-015613)

889 Sofuku, K., & Honda, T. (2018). *Influence of Endogenous Viral Sequences on Gene Expression*.  
890 IntechOpen. <https://doi.org/10.5772/intechopen.71864>

891 Stanke, M., Keller, O., Gunduz, I., Hayes, A., Waack, S., & Morgenstern, B. (2006). AUGUSTUS:  
892 ab initio prediction of alternative transcripts. *Nucleic Acids Research*, 34(Web Server), W435–  
893 W439. <https://doi.org/10.1093/nar/gkl200>

894 Stephens, T. G., González-Pech, R. A., Cheng, Y., Mohamed, A. R., Burt, D. W., Bhattacharya, D.,  
895 Ragan, M. A., & Chan, C. X. (2020). Genomes of the dinoflagellate *Polarella glacialis* encode  
896 tandemly repeated single-exon genes with adaptive functions. *BMC Biology*, 18(1), 56.  
897 <https://doi.org/10.1186/s12915-020-00782-8>

- 898 Stoye, J. P. (2012). Studies of endogenous retroviruses reveal a continuing evolutionary saga.  
899 *Nature Reviews Microbiology*, 10(6), 395–406. <https://doi.org/10.1038/nrmicro2783>
- 900 Suzuki, Y., Baidaliuk, A., Miesen, P., Frangeul, L., Crist, A. B., Merklings, S. H., Fontaine, A.,  
901 Lequime, S., Moltini-Conclois, I., Blanc, H., van Rij, R. P., Lambrechts, L., & Saleh, M.-C.  
902 (2020). Non-retroviral Endogenous Viral Element limits cognate virus replication in *Aedes*  
903 *aegypti* ovaries. *Current Biology*, 30(18), 3495-3506.e6.  
904 <https://doi.org/10.1016/j.cub.2020.06.057>
- 905 Takahashi, H., Fukuhara, T., Kitazawa, H., & Kormelink, R. (2019). Virus latency and the impact  
906 on plants. *Frontiers in Microbiology*, 10, 2764. <https://doi.org/10.3389/fmicb.2019.02764>
- 907 Tara Oceans Consortium Coordinators, Pesant, S., Not, F., Picheral, M., Kandels-Lewis, S., Le  
908 Bescot, N., Gorsky, G., Iudicone, D., Karsenti, E., Speich, S., Troublé, R., Dimier, C., &  
909 Searson, S. (2015). Open science resources for the discovery and analysis of Tara Oceans data.  
910 *Scientific Data*, 2(1), 150023. <https://doi.org/10.1038/sdata.2015.23>
- 911 ter Horst, A. M., Nigg, J. C., Dekker, F. M., & Falk, B. W. (n.d.). Endogenous Viral Elements are  
912 widespread in arthropod genomes and commonly give rise to PIWI-interacting RNAs. *Journal of*  
913 *Virology*, 93(6), e02124-18. <https://doi.org/10.1128/JVI.02124-18>
- 914 Vega Thurber, R., Payet, J. P., Thurber, A. R., & Correa, A. M. S. (2017). Virus–host interactions  
915 and their roles in coral reef health and disease. *Nature Reviews Microbiology*, 15(4), 205–216.  
916 <https://doi.org/10.1038/nrmicro.2016.176>
- 917 Tromas, N., Zwart, M. P., Forment, J., & Elena, S. F. (2014). Shrinkage of genome size in a plant  
918 RNA virus upon transfer of an essential viral gene into the host genome. *Genome Biology and*  
919 *Evolution*, 6(3), 538–550. <https://doi.org/10.1093/gbe/evu036>

- 920 van Oppen, M. J. H., Leong, J.-A., & Gates, R. D. (2009). Coral-virus interactions: A double-edged  
921 sword? *Symbiosis*, 47(1), 1–8. <https://doi.org/10.1007/BF03179964>
- 922 Wang, L., Wu, S., Liu, T., Sun, J., Chi, S., Liu, C., Li, X., Yin, J., Wang, X., & Yu, J. (2014).  
923 Endogenous viral elements in algal genomes. *Acta Oceanologica Sinica*, 33(2), 102–107.  
924 <https://doi.org/10.1007/s13131-014-0446-1>
- 925 Weynberg, K. D., Wood-Charlson, E. M., Suttle, C. A., & van Oppen, M. J. H. (2014). Generating  
926 viral metagenomes from the coral holobiont. *Frontiers in Microbiology*, 5.  
927 <https://doi.org/10.3389/fmicb.2014.00206>
- 928 Whitfield, Z. J., Dolan, P. T., Kunitomi, M., Tassetto, M., Seetin, M. G., Oh, S., Heiner, C.,  
929 Paxinos, E., & Andino, R. (2017). The diversity, structure, and function of heritable adaptive  
930 immunity sequences in the *Aedes aegypti* genome. *Current Biology*, 27(22), 3511-3519.e7.  
931 <https://doi.org/10.1016/j.cub.2017.09.067>
- 932 Wilson, W., Francis, I., Ryan, K., & Davy, S. (2001). Temperature induction of viruses in  
933 symbiotic dinoflagellates. *Aquatic Microbial Ecology*, 25, 99–102.  
934 <https://doi.org/10.3354/ame025099>
- 935 Wood-Charlson, E. M., Weynberg, K. D., Suttle, C. A., Roux, S., & van Oppen, M. J. H. (2015).  
936 Metagenomic characterization of viral communities in corals: mining biological signal from  
937 methodological noise: Methodological biases in coral viromics. *Environmental Microbiology*,  
938 17(10), 3440–3449. <https://doi.org/10.1111/1462-2920.12803>
- 939 Zhang, H., Zhuang, Y., Gill, J., & Lin, S. (2013). Proof that dinoflagellate Spliced Leader (DinoSL)  
940 is a useful hook for fishing dinoflagellate transcripts from mixed microbial samples:  
941 *Symbiodinium kawagutii* as a case study. *Protist*, 164(4), 510–527.  
942 <https://doi.org/10.1016/j.protis.2013.04.002>



- 943 Zuker, M. (2003). Mfold web server for nucleic acid folding and hybridization prediction. *Nucleic*  
944 *Acids Research*, 31(13), 3406–3415. <https://doi.org/10.1093/nar/gkg595>
